# Supplementary material for: Synaptic dysfunction and extracellular matrix dysregulation in dopaminergic neurons from sporadic and E326K-GBA1 Parkinson’s disease patients
Source: PubMed Central journal article supplement (PMC10876637; doi:10.1038/s41531-024-00653-x), 2024-02-19
Supplement: 41531_2024_653_MOESM1_ESM.pdf [file 41531_2024_653_MOESM1_ESM.pdf]

## Supplementary Figure Legends

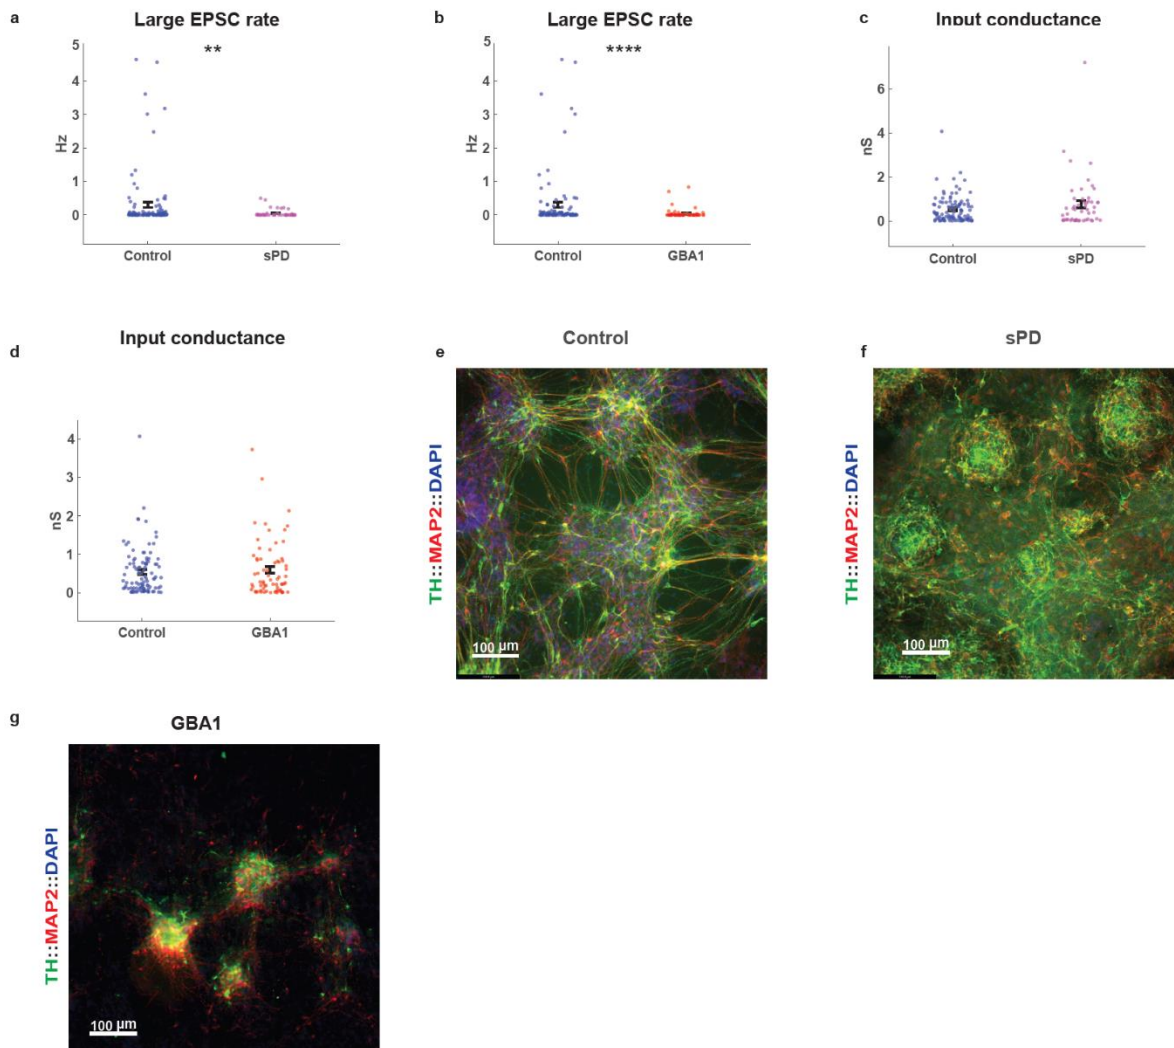

## Supplementary Figure 1

- (a) The large EPSC rate was significantly decreased in sPD neurons compared to control neurons. (b) The large EPSC rate was also significantly decreased in E326K-*GBA1* neurons compared to control neurons. (c) The input conductance was not significantly different between control and sPD neurons. (d) The input conductance was not significantly different between control and E326K-*GBA1* neurons. An example image

of DA neurons with ICC for Tyrosine Hydroxylase (TH) (green), MAP2 (red), DAPI (blue) in a (e) control (f) sPD, and (g) E326K-*GBA1* DA neuronal cultures.

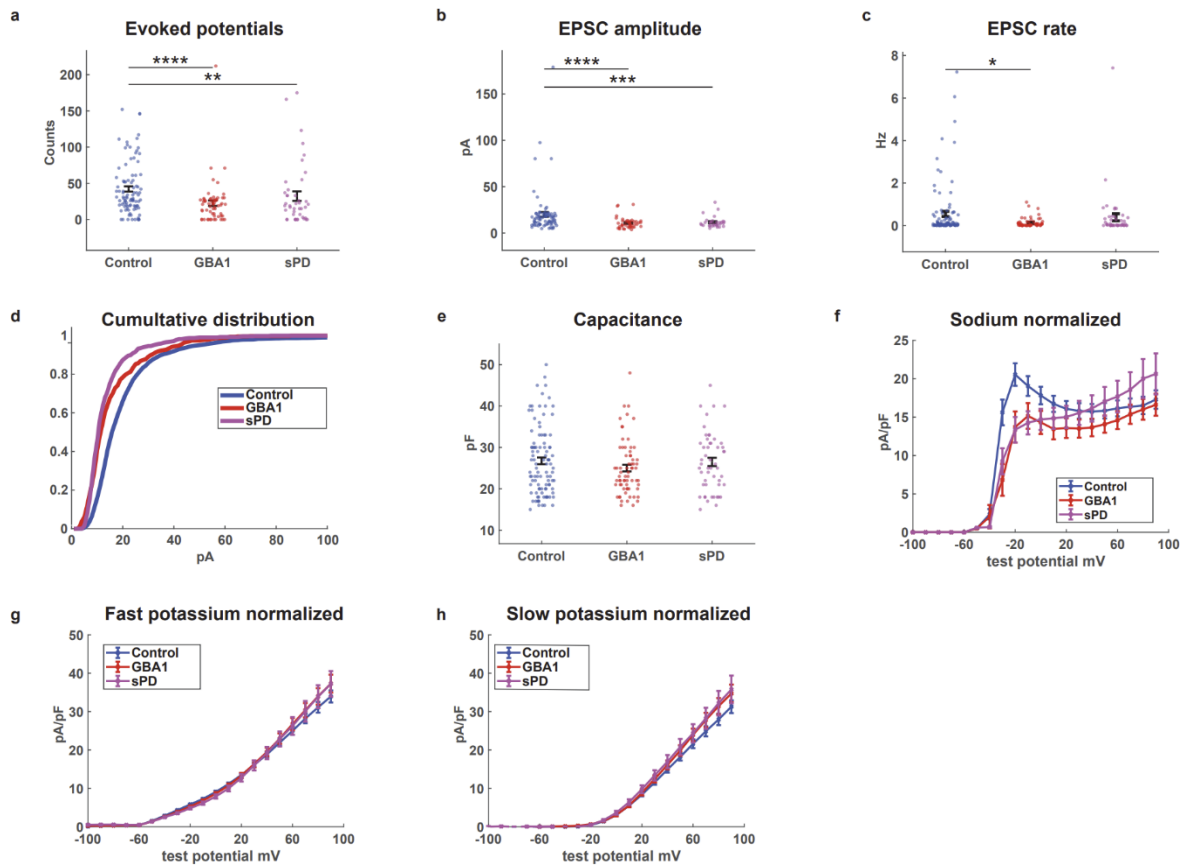

## Supplementary Figure 2

This figure shows a comparison between Control, E326K-*GBA1*, and sPD neurons together. (a) Both E326K-*GBA1* and sPD neurons were hypoexcitable compared to control neurons. (b) The EPSC amplitude was decreased in both E326K-*GBA1* and sPD compared to control neurons. (c) The EPSC rate in E326K-*GBA1* neurons was significantly reduced compared to control neurons (d) The cumulative distribution of EPSC amplitudes was left shifted in both sPD and E326K-*GBA1* neurons indicating smaller amplitudes. (e) The capacitance was similar between all groups. (f) The sodium currents were reduced in both E326K-*GBA1* and sPD

neurons compared to control neurons. (g) The fast potassium and (h) slow potassium currents were not significantly different between E326K-*GBA1*, sPD, and control neurons.

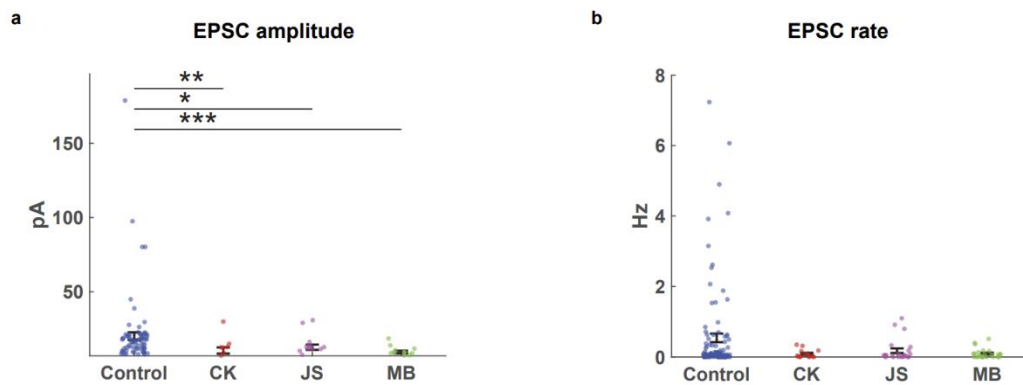

### Supp. Figure 3

This figure shows comparisons among individual E326K-*GBA1* patients compared to the control group. (a) The EPSC amplitude was significantly decreased in all E326K-*GBA1* lines compared to the controls. (b) The EPSC rate in all E326K-*GBA1* lines showed a trend of a decreased mean value compared to controls (but not significantly).

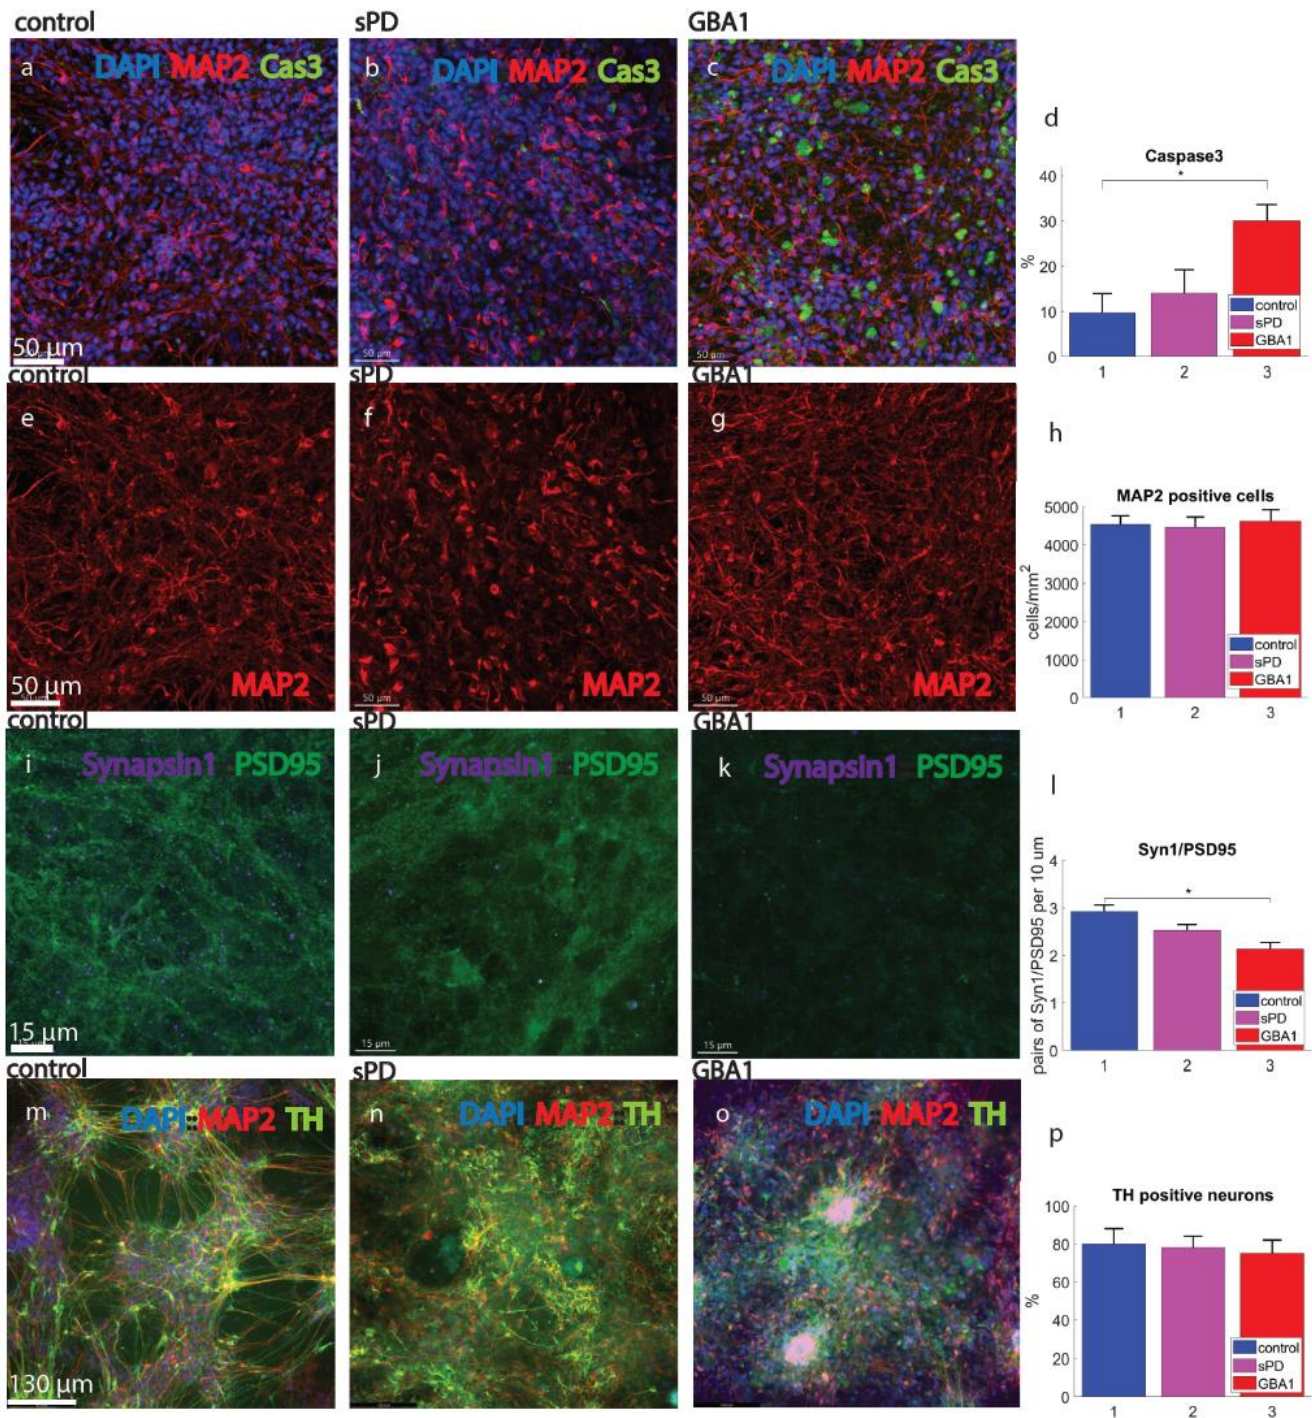

**Supplementary Figure 4, ICC**

(a-d) Caspase3 protein expression is elevated in E326K-*GBA1* neuronal cultures. Representative traces (a-c) and the averages (d) are shown. (e-h) Despite more Caspase3 positive cells in the E326K-*GBA1* cultures, the density of MAP2 positive neurons was the same between the three groups. Representative images (e-g) and the averages (h) are presented. (i-l)



A reduction in the density of Synapsin1::PSD95 pairs was observed in the E326K-*GBA1* neuronal cultures. Representative images (i-k) and the averages (l) are presented. (m-p) The percentage of TH positive neurons was more than 80% on average in all the three groups. Representative images (m-o) and the averages (p) are presented.

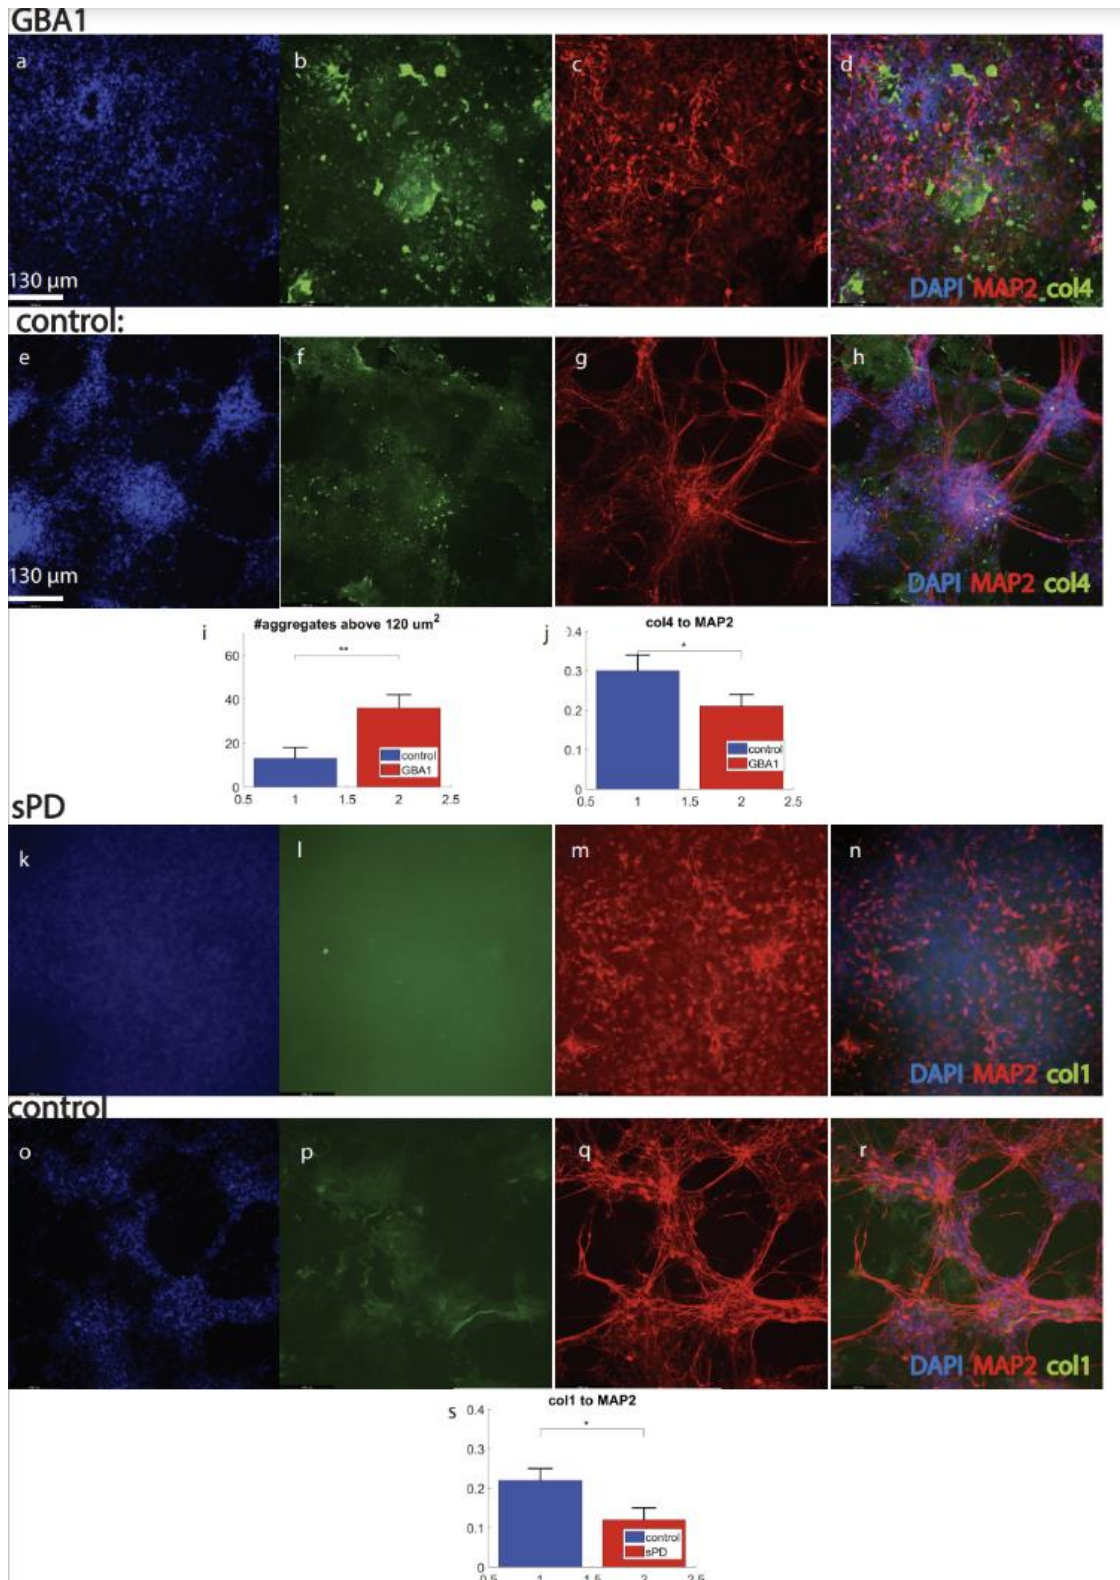

### Supplementary Figure 5, ICC

ICC images for DAPI (blue), MAP2(red), and collagen 4 (green) in the 2 upper rows and collagen1 (green) in the 2 bottom rows. (a-d) Example ICC images for a E326K-*GBA1* culture. (e-h) Example ICC images for a control culture. (i) E326K-*GBA1* DA neuronal cultures exhibited more aggregation of the collagen 4 protein compared to control DA neurons culture. (j) However, the diffuse background of collagen 4 in the E326K-*GBA1* DA neuronal cultures had a lower intensity compared to control DA neuronal cultures. (k-n) Example ICC images for an sPD culture. (o-r) Example ICC images for a control culture. (s) The diffuse background of collagen 1 in the sPD DA neuronal cultures had a lower intensity compared to control DA neuronal cultures.

## Supplementary tables

| Enrichment kegg <i>GBA1</i> vs Control                   |       |          |      |          |        |
|----------------------------------------------------------|-------|----------|------|----------|--------|
| Pathway                                                  | Total | Expected | Hits | P.Value  | FDR    |
| Basal cell carcinoma                                     | 63    | 2.28     | 10   | 7.67E-05 | 0.0176 |
| ECM-receptor interaction                                 | 82    | 2.97     | 11   | 0.000163 | 0.0176 |
| Pathways in cancer                                       | 530   | 19.2     | 36   | 0.000166 | 0.0176 |
| Hypertrophic cardiomyopathy (HCM)                        | 85    | 3.08     | 11   | 0.000226 | 0.0179 |
| Focal adhesion                                           | 199   | 7.2      | 17   | 0.00085  | 0.0541 |
| Arrhythmogenic right ventricular cardiomyopathy (ARVC)   | 72    | 2.61     | 9    | 0.00108  | 0.0571 |
| Hippo signaling pathway                                  | 154   | 5.57     | 14   | 0.00133  | 0.0605 |
| Dilated cardiomyopathy                                   | 91    | 3.29     | 10   | 0.00158  | 0.0629 |
| Phenylalanine metabolism                                 | 17    | 0.615    | 4    | 0.00275  | 0.0972 |
| Sulfur metabolism                                        | 9     | 0.326    | 3    | 0.00335  | 0.106  |
| Signaling pathways regulating pluripotency of stem cells | 139   | 5.03     | 12   | 0.00442  | 0.114  |
| PI3K-Akt signaling pathway                               | 354   | 12.8     | 23   | 0.00455  | 0.114  |
| Regulation of actin cytoskeleton                         | 214   | 7.74     | 16   | 0.00464  | 0.114  |
| Breast cancer                                            | 147   | 5.32     | 12   | 0.00689  | 0.156  |
| Mannose type O-glycan biosynthesis                       | 23    | 0.832    | 4    | 0.00863  | 0.183  |
| Wnt signaling pathway                                    | 158   | 5.72     | 12   | 0.0119   | 0.237  |
| Melanoma                                                 | 72    | 2.61     | 7    | 0.0149   | 0.279  |
| Protein digestion and absorption                         | 90    | 3.26     | 8    | 0.0159   | 0.28   |
| Transcriptional misregulation in cancer                  | 186   | 6.73     | 13   | 0.0173   | 0.289  |
| FoxO signaling pathway                                   | 132   | 4.78     | 10   | 0.0211   | 0.336  |
| AGE-RAGE signaling pathway in diabetic complications     | 100   | 3.62     | 8    | 0.028    | 0.425  |
| Proteoglycans in cancer                                  | 201   | 7.27     | 13   | 0.0304   | 0.439  |
| Arginine and proline metabolism                          | 50    | 1.81     | 5    | 0.0337   | 0.446  |
| N-Glycan biosynthesis                                    | 50    | 1.81     | 5    | 0.0337   | 0.446  |
| Neuroactive ligand-receptor interaction                  | 338   | 12.2     | 19   | 0.0372   | 0.465  |
| Adipocytokine signaling pathway                          | 69    | 2.5      | 6    | 0.0381   | 0.465  |
| Insulin resistance                                       | 108   | 3.91     | 8    | 0.0416   | 0.477  |
| Other types of O-glycan biosynthesis                     | 22    | 0.796    | 3    | 0.0434   | 0.477  |
| African trypanosomiasis                                  | 37    | 1.34     | 4    | 0.0435   | 0.477  |
| Purine metabolism                                        | 130   | 4.7      | 9    | 0.0458   | 0.483  |
| TGF-beta signaling pathway                               | 92    | 3.33     | 7    | 0.0486   | 0.483  |
| Proximal tubule bicarbonate reclamation                  | 23    | 0.832    | 3    | 0.0487   | 0.483  |

**Supplementary Table 1.** KEGG pathway enrichment analysis of differentially expressed genes (DEGs) in E326K-*GBA1* versus control neurons. The table lists significantly enriched pathways, the number of genes in each pathway, the expected number of DEGs in the pathway, the actual number of DEGs observed in the pathway, p-values from the performed enrichment test, and Benjamini-Hochberg adjusted FDR p-values (q-values). Pathways are ordered by statistical significance.

| enrichment kegg_GBA1_downregulated vs Control          |       |          |      |          |        |
|--------------------------------------------------------|-------|----------|------|----------|--------|
| Pathway                                                | Total | Expected | Hits | P.Value  | FDR    |
| Pathways in cancer                                     | 530   | 13.2     | 29   | 4.14E-05 | 0.0132 |
| Focal adhesion                                         | 199   | 4.94     | 15   | 0.000119 | 0.0189 |
| PI3K-Akt signaling pathway                             | 354   | 8.78     | 20   | 0.000471 | 0.0488 |
| Jak-STAT signaling pathway                             | 162   | 4.02     | 12   | 0.000673 | 0.0488 |
| Regulation of actin cytoskeleton                       | 214   | 5.31     | 14   | 0.000848 | 0.0488 |
| ECM-receptor interaction                               | 82    | 2.03     | 8    | 0.000921 | 0.0488 |
| Hypertrophic cardiomyopathy (HCM)                      | 85    | 2.11     | 8    | 0.00117  | 0.0531 |
| Arrhythmogenic right ventricular cardiomyopathy (ARVC) | 72    | 1.79     | 7    | 0.00196  | 0.0779 |
| Proteoglycans in cancer                                | 201   | 4.99     | 12   | 0.0042   | 0.144  |
| Th17 cell differentiation                              | 107   | 2.66     | 8    | 0.00498  | 0.144  |
| Insulin resistance                                     | 108   | 2.68     | 8    | 0.00527  | 0.144  |
| FoxO signaling pathway                                 | 132   | 3.28     | 9    | 0.00544  | 0.144  |
| Dilated cardiomyopathy                                 | 91    | 2.26     | 7    | 0.00726  | 0.178  |
| Melanoma                                               | 72    | 1.79     | 6    | 0.00868  | 0.197  |
| AGE-RAGE signaling pathway in diabetic complications   | 100   | 2.48     | 7    | 0.0119   | 0.237  |
| African trypanosomiasis                                | 37    | 0.918    | 4    | 0.0128   | 0.237  |
| EGFR tyrosine kinase inhibitor resistance              | 79    | 1.96     | 6    | 0.0134   | 0.237  |
| Complement and coagulation cascades                    | 79    | 1.96     | 6    | 0.0134   | 0.237  |
| Transcriptional misregulation in cancer                | 186   | 4.62     | 10   | 0.0172   | 0.288  |
| Basal cell carcinoma                                   | 63    | 1.56     | 5    | 0.0196   | 0.312  |
| Adipocytokine signaling pathway                        | 69    | 1.71     | 5    | 0.0279   | 0.422  |
| Prolactin signaling pathway                            | 70    | 1.74     | 5    | 0.0295   | 0.422  |
| Malaria                                                | 49    | 1.22     | 4    | 0.0327   | 0.422  |
| Adherens junction                                      | 72    | 1.79     | 5    | 0.0328   | 0.422  |
| Hematopoietic cell lineage                             | 97    | 2.41     | 6    | 0.0332   | 0.422  |
| Bacterial invasion of epithelial cells                 | 74    | 1.84     | 5    | 0.0363   | 0.444  |
| Pancreatic cancer                                      | 75    | 1.86     | 5    | 0.0381   | 0.449  |
| Pertussis                                              | 76    | 1.89     | 5    | 0.04     | 0.454  |
| Kaposi's sarcoma-associated herpesvirus infection      | 186   | 4.62     | 9    | 0.0417   | 0.457  |

**Supplementary Table 2.** Downregulated and upregulated (separately) KEGG pathways in E326K-*GBA1* versus control neurons. Significantly enriched pathways for downregulated DEGs, with stats and enrichment analysis results displayed as in Supplementary Table 1.



**enrichment go bp GBA1**

| Pathway                                                                            | Total | Expected | Hits | P.Value  | FDR      |
|------------------------------------------------------------------------------------|-------|----------|------|----------|----------|
| Muscle organ development                                                           | 389   | 13.7     | 34   | 1.07E-06 | 0.000878 |
| Skeletal muscle tissue development                                                 | 197   | 6.95     | 21   | 6.43E-06 | 0.00263  |
| Regulation of anatomical structure morphogenesis                                   | 702   | 24.8     | 47   | 1.79E-05 | 0.00398  |
| Positive regulation of epithelial cell proliferation                               | 120   | 4.23     | 15   | 2.07E-05 | 0.00398  |
| Gland development                                                                  | 303   | 10.7     | 26   | 2.75E-05 | 0.00398  |
| Negative regulation of developmental process                                       | 674   | 23.8     | 45   | 2.91E-05 | 0.00398  |
| Negative regulation of cell differentiation                                        | 540   | 19       | 38   | 4.06E-05 | 0.00476  |
| Tissue morphogenesis                                                               | 566   | 20       | 39   | 5.10E-05 | 0.00523  |
| Central nervous system development                                                 | 784   | 27.7     | 49   | 6.92E-05 | 0.0063   |
| Morphogenesis of an epithelium                                                     | 440   | 15.5     | 32   | 8.97E-05 | 0.00735  |
| Positive regulation of transcription from RNA polymerase II promoter               | 800   | 28.2     | 49   | 0.000114 | 0.00823  |
| Vasculature development                                                            | 652   | 23       | 42   | 0.00012  | 0.00823  |
| Tissue remodeling                                                                  | 126   | 4.44     | 14   | 0.000142 | 0.00856  |
| Striated muscle tissue development                                                 | 354   | 12.5     | 27   | 0.000146 | 0.00856  |
| Regulation of cell differentiation                                                 | 1290  | 45.5     | 70   | 0.00017  | 0.00927  |
| Skeletal system development                                                        | 459   | 16.2     | 32   | 0.000195 | 0.00942  |
| Cell development                                                                   | 1840  | 65       | 93   | 0.000195 | 0.00942  |
| Regulation of developmental process                                                | 1880  | 66.2     | 94   | 0.000234 | 0.0107   |
| Negative regulation of response to stimulus                                        | 967   | 34.1     | 55   | 0.000292 | 0.0126   |
| Anatomical structure formation involved in morphogenesis                           | 2090  | 73.7     | 102  | 0.000308 | 0.0126   |
| Regulation of sequence_specific DNA binding transcription factor activity          | 372   | 13.1     | 27   | 0.000325 | 0.0126   |
| Growth                                                                             | 839   | 29.6     | 49   | 0.000348 | 0.0126   |
| Brain development                                                                  | 559   | 19.7     | 36   | 0.00037  | 0.0126   |
| Endothelial cell proliferation                                                     | 92    | 3.25     | 11   | 0.000384 | 0.0126   |
| Negative regulation of transferase activity                                        | 189   | 6.67     | 17   | 0.000385 | 0.0126   |
| Regulation of endothelial cell proliferation                                       | 79    | 2.79     | 10   | 0.000442 | 0.0139   |
| Organ morphogenesis                                                                | 966   | 34.1     | 54   | 0.000504 | 0.0148   |
| Positive regulation of cell proliferation                                          | 786   | 27.7     | 46   | 0.000506 | 0.0148   |
| Developmental growth                                                               | 290   | 10.2     | 22   | 0.000633 | 0.0179   |
| Cell fate commitment                                                               | 254   | 8.96     | 20   | 0.000694 | 0.019    |
| Positive regulation of peptidyl_tyrosine phosphorylation                           | 134   | 4.73     | 13   | 0.000906 | 0.0239   |
| Tissue development                                                                 | 1680  | 59.4     | 83   | 0.000942 | 0.0239   |
| Tube development                                                                   | 506   | 17.8     | 32   | 0.00105  | 0.0239   |
| Sensory organ development                                                          | 485   | 17.1     | 31   | 0.00105  | 0.0239   |
| Positive regulation of cell migration                                              | 263   | 9.28     | 20   | 0.00107  | 0.0239   |
| Positive regulation of signal transduction                                         | 998   | 35.2     | 54   | 0.00107  | 0.0239   |
| Regulation of peptidyl_tyrosine phosphorylation                                    | 171   | 6.03     | 15   | 0.00108  | 0.0239   |
| Negative regulation of sequence_specific DNA binding transcription factor activity | 121   | 4.27     | 12   | 0.00116  | 0.0251   |
| Neurogenesis                                                                       | 1390  | 49.1     | 70   | 0.00142  | 0.0291   |
| Positive regulation of lymphocyte activation                                       | 250   | 8.82     | 19   | 0.00142  | 0.0291   |
| Cell morphogenesis involved in differentiation                                     | 827   | 29.2     | 46   | 0.00146  | 0.0291   |
| Generation of neurons                                                              | 1300  | 46       | 66   | 0.0017   | 0.0331   |
| Neuron differentiation                                                             | 1190  | 41.8     | 61   | 0.00176  | 0.0335   |

|                                               |      |      |     |         |        |
|-----------------------------------------------|------|------|-----|---------|--------|
| Positive regulation of binding                | 79   | 2.79 | 9   | 0.00181 | 0.0337 |
| Positive regulation of cell differentiation   | 571  | 20.1 | 34  | 0.00204 | 0.0371 |
| Regulation of lymphocyte activation           | 360  | 12.7 | 24  | 0.00218 | 0.0384 |
| Regulation of neurogenesis                    | 444  | 15.7 | 28  | 0.0022  | 0.0384 |
| Embryonic morphogenesis                       | 581  | 20.5 | 34  | 0.00269 | 0.0453 |
| Regulation of cell morphogenesis              | 325  | 11.5 | 22  | 0.00272 | 0.0453 |
| Regulation of cell proliferation              | 1430 | 50.4 | 70  | 0.00276 | 0.0453 |
| Tube morphogenesis                            | 347  | 12.2 | 23  | 0.00287 | 0.0456 |
| Regulation of binding                         | 189  | 6.67 | 15  | 0.00289 | 0.0456 |
| Negative regulation of cell proliferation     | 585  | 20.6 | 34  | 0.003   | 0.0464 |
| Negative regulation of signal transduction    | 790  | 27.9 | 43  | 0.00309 | 0.0469 |
| Regulation of cell migration                  | 456  | 16.1 | 28  | 0.00321 | 0.0479 |
| Nervous system development                    | 2190 | 77.4 | 100 | 0.00341 | 0.0494 |
| Regulation of T cell proliferation            | 120  | 4.23 | 11  | 0.00343 | 0.0494 |
| Pattern specification process                 | 503  | 17.7 | 30  | 0.00357 | 0.0505 |
| Neuron development                            | 945  | 33.3 | 49  | 0.00425 | 0.0584 |
| Negative regulation of growth                 | 197  | 6.95 | 15  | 0.00427 | 0.0584 |
| Angiogenesis                                  | 426  | 15   | 26  | 0.0048  | 0.0645 |
| Cell_substrate adhesion                       | 241  | 8.5  | 17  | 0.00529 | 0.07   |
| Positive regulation of developmental process  | 817  | 28.8 | 43  | 0.0056  | 0.0729 |
| Hematopoietic or lymphoid organ development   | 679  | 24   | 37  | 0.00577 | 0.074  |
| Glycoprotein metabolic process                | 458  | 16.2 | 27  | 0.00646 | 0.0789 |
| Development of primary sexual characteristics | 246  | 8.68 | 17  | 0.00647 | 0.0789 |
| Bone remodeling                               | 63   | 2.22 | 7   | 0.00654 | 0.0789 |
| Glycoprotein biosynthetic process             | 393  | 13.9 | 24  | 0.00655 | 0.0789 |
| Hemopoiesis                                   | 640  | 22.6 | 35  | 0.00679 | 0.0806 |
| Regulation of response to external stimulus   | 461  | 16.3 | 27  | 0.00703 | 0.0813 |
| Peptidyl_tyrosine phosphorylation             | 228  | 8.04 | 16  | 0.00704 | 0.0813 |
| Regionalization                               | 353  | 12.5 | 22  | 0.00718 | 0.0818 |
| Peptidyl_tyrosine modification                | 230  | 8.11 | 16  | 0.00763 | 0.0857 |
| Cell migration                                | 1050 | 37.2 | 52  | 0.00856 | 0.0949 |
| B cell activation                             | 194  | 6.84 | 14  | 0.00895 | 0.0966 |
| Immune system development                     | 722  | 25.5 | 38  | 0.00895 | 0.0966 |
| Regulation of T cell activation               | 279  | 9.84 | 18  | 0.0102  | 0.109  |
| Cell_matrix adhesion                          | 159  | 5.61 | 12  | 0.0107  | 0.111  |
| Protein processing                            | 140  | 4.94 | 11  | 0.0107  | 0.111  |
| Positive regulation of transport              | 570  | 20.1 | 31  | 0.0113  | 0.116  |
| Regulation of growth                          | 548  | 19.3 | 30  | 0.0116  | 0.117  |
| Anatomical structure morphogenesis            | 2820 | 99.3 | 120 | 0.0119  | 0.119  |
| Regulation of cell shape                      | 106  | 3.74 | 9   | 0.0126  | 0.124  |
| Peptidyl_amino acid modification              | 739  | 26.1 | 38  | 0.0127  | 0.124  |
| Hormone metabolic process                     | 203  | 7.16 | 14  | 0.013   | 0.125  |
| Embryo development                            | 1080 | 38.2 | 52  | 0.0142  | 0.136  |
| Response to external stimulus                 | 1510 | 53.3 | 69  | 0.0145  | 0.136  |
| Regulation of intracellular transport         | 290  | 10.2 | 18  | 0.0147  | 0.136  |
| T cell proliferation                          | 147  | 5.19 | 11  | 0.0151  | 0.136  |
| Regulation of endocytosis                     | 128  | 4.52 | 10  | 0.0152  | 0.136  |
| Negative regulation of immune system process  | 207  | 7.3  | 14  | 0.0152  | 0.136  |

|                                                      |      |      |     |        |       |
|------------------------------------------------------|------|------|-----|--------|-------|
| Organ development                                    | 3290 | 116  | 137 | 0.0153 | 0.136 |
| Positive regulation of T cell proliferation          | 75   | 2.65 | 7   | 0.0164 | 0.143 |
| Cell proliferation                                   | 1900 | 67.1 | 84  | 0.0164 | 0.143 |
| Leukocyte differentiation                            | 404  | 14.3 | 23  | 0.0167 | 0.143 |
| Regulation of angiogenesis                           | 169  | 5.96 | 12  | 0.0167 | 0.143 |
| Negative regulation of hydrolase activity            | 253  | 8.92 | 16  | 0.0177 | 0.149 |
| Negative regulation of transport                     | 318  | 11.2 | 19  | 0.0179 | 0.149 |
| Positive regulation of cell cycle                    | 113  | 3.99 | 9   | 0.0184 | 0.149 |
| Regulation of signal transduction                    | 2440 | 85.9 | 104 | 0.0186 | 0.149 |
| Protein autophosphorylation                          | 192  | 6.77 | 13  | 0.0187 | 0.149 |
| Myoblast differentiation                             | 44   | 1.55 | 5   | 0.0187 | 0.149 |
| Glucan metabolic process                             | 95   | 3.35 | 8   | 0.0189 | 0.149 |
| Regulation of nucleocytoplasmic transport            | 172  | 6.07 | 12  | 0.0189 | 0.149 |
| Protein maturation                                   | 153  | 5.4  | 11  | 0.0197 | 0.154 |
| Positive regulation of phosphate metabolic process   | 789  | 27.8 | 39  | 0.0208 | 0.161 |
| Regulation of homeostatic process                    | 324  | 11.4 | 19  | 0.0213 | 0.163 |
| Neuron projection development                        | 816  | 28.8 | 40  | 0.0218 | 0.166 |
| Gliogenesis                                          | 176  | 6.21 | 12  | 0.0222 | 0.167 |
| Acute inflammatory response                          | 118  | 4.16 | 9   | 0.0237 | 0.177 |
| Extracellular structure organization                 | 242  | 8.54 | 15  | 0.0249 | 0.184 |
| Rhythmic process                                     | 200  | 7.05 | 13  | 0.0252 | 0.184 |
| Positive regulation of protein phosphorylation       | 681  | 24   | 34  | 0.0261 | 0.19  |
| Enzyme linked receptor protein signaling pathway     | 1180 | 41.4 | 54  | 0.0265 | 0.191 |
| Positive regulation of T cell activation             | 202  | 7.13 | 13  | 0.027  | 0.193 |
| JAK_STAT cascade                                     | 121  | 4.27 | 9   | 0.0274 | 0.193 |
| Response to steroid hormone stimulus                 | 267  | 9.42 | 16  | 0.0276 | 0.194 |
| Negative regulation of phosphorylation               | 246  | 8.68 | 15  | 0.0282 | 0.196 |
| Regulation of multicellular organismal process       | 2480 | 87.4 | 104 | 0.0292 | 0.199 |
| "Positive regulation of transcription DNA_dependent" | 1260 | 44.4 | 57  | 0.0293 | 0.199 |

**Supplementary Table 3.** Gene Ontology Biological Process enrichment analysis of DEGs in E326K-*GBA1* versus control neurons. The table displays significantly enriched terms with stats and enrichment analysis results displayed as in Supplementary Table 1.

| enrichment_go_cc_GBA1               |       |          |      |          |          |
|-------------------------------------|-------|----------|------|----------|----------|
| Pathway                             | Total | Expected | Hits | P.Value  | FDR      |
| Extracellular region part           | 1320  | 42.9     | 75   | 1.31E-06 | 0.000294 |
| Proteinaceous extracellular matrix  | 398   | 12.9     | 31   | 6.85E-06 | 0.000771 |
| Extracellular space                 | 901   | 29.3     | 54   | 1.04E-05 | 0.000782 |
| Receptor complex                    | 189   | 6.15     | 18   | 4.63E-05 | 0.0026   |
| Extracellular matrix part           | 204   | 6.63     | 17   | 0.000374 | 0.0168   |
| Extracellular matrix                | 570   | 18.5     | 34   | 0.000511 | 0.0191   |
| Endoplasmic reticulum lumen         | 175   | 5.69     | 15   | 0.000606 | 0.0195   |
| Cell surface                        | 518   | 16.8     | 31   | 0.000845 | 0.0218   |
| Collagen                            | 93    | 3.02     | 10   | 0.000873 | 0.0218   |
| Basement membrane                   | 100   | 3.25     | 10   | 0.00153  | 0.0344   |
| Basolateral plasma membrane         | 162   | 5.27     | 13   | 0.00247  | 0.0506   |
| Integral to plasma membrane         | 1270  | 41.3     | 59   | 0.00343  | 0.0558   |
| Intrinsic to plasma membrane        | 1320  | 43       | 61   | 0.00347  | 0.0558   |
| Integrin complex                    | 32    | 1.04     | 5    | 0.00347  | 0.0558   |
| Integral to Golgi membrane          | 47    | 1.53     | 6    | 0.00398  | 0.0597   |
| Intrinsic to Golgi membrane         | 50    | 1.63     | 6    | 0.00543  | 0.0763   |
| Extracellular region                | 2860  | 92.9     | 113  | 0.0131   | 0.173    |
| Acetylcholine_gated channel complex | 17    | 0.553    | 3    | 0.0165   | 0.207    |
| Actin cytoskeleton                  | 430   | 14       | 22   | 0.0247   | 0.293    |
| Secretory granule                   | 276   | 8.97     | 15   | 0.0367   | 0.401    |
| Cytoplasmic vesicle                 | 1110  | 36.1     | 47   | 0.0374   | 0.401    |
| Vesicle                             | 1210  | 39.3     | 50   | 0.0467   | 0.478    |

**Supplementary Table 4.** Gene Ontology Cellular Component enrichment analysis of DEGs in E326K-*GBA1* versus controls. The table displays significantly enriched terms with stats and enrichment analysis results displayed as in Supplementary Table 1.

| enrichment_go_mf_GBA1                                                                         |       |          |      |          |       |
|-----------------------------------------------------------------------------------------------|-------|----------|------|----------|-------|
| Pathway                                                                                       | Total | Expected | Hits | P.Value  | FDR   |
| Transferase activity, transferring hexosyl groups                                             | 237   | 8.31     | 19   | 0.000707 | 0.192 |
| Transferase activity, transferring glycosyl groups                                            | 333   | 11.7     | 23   | 0.00159  | 0.192 |
| Heparin binding                                                                               | 130   | 4.56     | 12   | 0.00206  | 0.192 |
| Pattern binding                                                                               | 17    | 0.596    | 4    | 0.00247  | 0.192 |
| Polysaccharide binding                                                                        | 17    | 0.596    | 4    | 0.00247  | 0.192 |
| Glycosaminoglycan binding                                                                     | 178   | 6.24     | 14   | 0.00406  | 0.263 |
| RNA polymerase II distal enhancer sequence_specific DNA binding transcription factor activity | 110   | 3.86     | 10   | 0.00527  | 0.292 |
| Growth factor activity                                                                        | 170   | 5.96     | 13   | 0.00696  | 0.338 |
| Metalloendopeptidase activity                                                                 | 123   | 4.31     | 10   | 0.0113   | 0.487 |
| Double_stranded DNA binding                                                                   | 149   | 5.23     | 11   | 0.0159   | 0.565 |
| G_protein coupled receptor binding                                                            | 232   | 8.14     | 15   | 0.017    | 0.565 |
| Calmodulin binding                                                                            | 171   | 6        | 12   | 0.0175   | 0.565 |
| UDP_glycosyltransferase activity                                                              | 153   | 5.37     | 11   | 0.019    | 0.568 |
| Acetylglucosaminyltransferase activity                                                        | 47    | 1.65     | 5    | 0.0238   | 0.66  |
| Positive regulation of transcription, DNA_dependent                                           | 1260  | 44.1     | 57   | 0.0268   | 0.692 |
| Acetylcholine_activated cation_selective channel activity                                     | 21    | 0.737    | 3    | 0.0357   | 0.865 |
| GTPase activity                                                                               | 241   | 8.45     | 14   | 0.0451   | 0.954 |
| Structure_specific DNA binding                                                                | 242   | 8.49     | 14   | 0.0464   | 0.954 |
| Cytokine activity                                                                             | 220   | 7.72     | 13   | 0.0467   | 0.954 |

**Supplementary Table 5.** Gene Ontology Molecular Function enrichment analysis of DEGs in E326K-*GBA1* versus controls. The table displays significantly enriched terms with stats and enrichment analysis results displayed as in Supplementary Table 1.



| enrichment GO CC sPD                                        |       |      |             |          |
|-------------------------------------------------------------|-------|------|-------------|----------|
| Pathway                                                     | Total | Hits | Enrichment  | FDR      |
| Neuron projection                                           | 1444  | 71   | 2.259790233 | 5.29E-08 |
| External encapsulating structure                            | 601   | 39   | 2.982408352 | 2.12E-07 |
| Extracellular matrix                                        | 600   | 39   | 2.987379032 | 2.12E-07 |
| Synapse                                                     | 1443  | 68   | 2.165806005 | 2.12E-07 |
| Collagen-containing extracellular matrix                    | 446   | 32   | 3.297555331 | 4.87E-07 |
| Receptor complex                                            | 422   | 28   | 3.04945727  | 1.95E-05 |
| Plasma membrane region                                      | 1323  | 58   | 2.014861142 | 2.52E-05 |
| Integral component of plasma membrane                       | 1881  | 74   | 1.808089383 | 3.22E-05 |
| Intrinsic component of plasma membrane                      | 1965  | 76   | 1.77757531  | 3.78E-05 |
| Synaptic membrane                                           | 401   | 26   | 2.979929209 | 4.94E-05 |
| Postsynapse                                                 | 682   | 36   | 2.426024028 | 5.49E-05 |
| Somatodendritic compartment                                 | 913   | 43   | 2.164585026 | 9.18E-05 |
| Postsynaptic membrane                                       | 297   | 21   | 3.249674161 | 0.000112 |
| Plasma membrane signaling receptor complex                  | 194   | 16   | 3.790488859 | 0.000237 |
| Postsynaptic specialization membrane                        | 121   | 12   | 4.557984537 | 0.000514 |
| Fibrillar collagen trimer                                   | 16    | 5    | 14.36239919 | 0.000544 |
| AMPA glutamate receptor complex                             | 26    | 6    | 10.6060794  | 0.000544 |
| Banded collagen fibril                                      | 16    | 5    | 14.36239919 | 0.000544 |
| Synaptic vesicle                                            | 213   | 16   | 3.452370135 | 0.000564 |
| Neuronal cell body                                          | 535   | 28   | 2.405366295 | 0.000564 |
| Axon                                                        | 691   | 33   | 2.194890528 | 0.000641 |
| Postsynaptic specialization                                 | 376   | 22   | 2.689130062 | 0.000767 |
| Integral component of postsynaptic specialization membrane  | 74    | 9    | 5.589690497 | 0.000797 |
| Postsynaptic density                                        | 352   | 21   | 2.741912573 | 0.000801 |
| Synaptic vesicle membrane                                   | 114   | 11   | 4.434705716 | 0.000819 |
| Asymmetric synapse                                          | 358   | 21   | 2.695958731 | 0.000819 |
| Cell body                                                   | 614   | 30   | 2.245586845 | 0.000819 |
| Glutamatergic synapse                                       | 358   | 21   | 2.695958731 | 0.000819 |
| Neuron to neuron synapse                                    | 385   | 22   | 2.626267281 | 0.000819 |
| Exocytic vesicle membrane                                   | 114   | 11   | 4.434705716 | 0.000819 |
| Intrinsic component of postsynaptic specialization membrane | 78    | 9    | 5.303039702 | 0.000904 |
| Exocytic vesicle                                            | 234   | 16   | 3.142542046 | 0.001051 |
| Dendrite                                                    | 674   | 31   | 2.113872404 | 0.001433 |
| Excitatory synapse                                          | 49    | 7    | 6.565668203 | 0.001433 |
| Dendritic tree                                              | 676   | 31   | 2.107618343 | 0.001433 |
| Complex of collagen trimers                                 | 25    | 5    | 9.191935484 | 0.002814 |
| Postsynaptic density membrane                               | 95    | 9    | 4.354074703 | 0.003523 |
| Presynapse                                                  | 527   | 25   | 2.180250352 | 0.003789 |
| Dendrite membrane                                           | 43    | 6    | 6.412978245 | 0.004649 |
| Secretory vesicle                                           | 1150  | 43   | 1.718492286 | 0.005866 |
| Collagen trimer                                             | 105   | 9    | 3.939400922 | 0.006406 |
| Neuron projection membrane                                  | 64    | 7    | 5.026839718 | 0.006406 |
| Plasma membrane protein complex                             | 712   | 30   | 1.936503262 | 0.006406 |
| Ionotropic glutamate receptor complex                       | 47    | 6    | 5.867192862 | 0.006745 |

|                                                      |      |    |             |          |
|------------------------------------------------------|------|----|-------------|----------|
| Synaptic cleft                                       | 18   | 4  | 10.21326165 | 0.006758 |
| Neurotransmitter receptor complex                    | 49   | 6  | 5.627715602 | 0.0081   |
| Integral component of postsynaptic density membrane  | 51   | 6  | 5.407020873 | 0.009843 |
| Dendritic spine                                      | 193  | 12 | 2.857596523 | 0.013227 |
| GABA-ergic synapse                                   | 74   | 7  | 4.347537053 | 0.013227 |
| Golgi apparatus                                      | 1812 | 59 | 1.496479563 | 0.013477 |
| Cell projection membrane                             | 368  | 18 | 2.2480277   | 0.013477 |
| Neuron spine                                         | 196  | 12 | 2.813857801 | 0.013477 |
| Integral component of postsynaptic membrane          | 119  | 9  | 3.47594199  | 0.013477 |
| Intrinsic component of postsynaptic density membrane | 55   | 6  | 5.013782991 | 0.013477 |
| Intrinsic component of postsynaptic membrane         | 125  | 9  | 3.309096774 | 0.01742  |
| Endoplasmic reticulum lumen                          | 328  | 16 | 2.241935484 | 0.024315 |
| Basolateral plasma membrane                          | 240  | 13 | 2.489482527 | 0.024382 |
| Parallel fiber to Purkinje cell synapse              | 13   | 3  | 10.6060794  | 0.024544 |
| Collagen type V trimer                               | 4    | 2  | 22.97983871 | 0.026696 |
| Leading edge membrane                                | 189  | 11 | 2.67490186  | 0.028219 |
| Basal part of cell                                   | 283  | 14 | 2.273623618 | 0.035371 |
| G protein-coupled receptor complex                   | 15   | 3  | 9.191935484 | 0.035371 |
| Calcitonin family receptor complex                   | 5    | 2  | 18.38387097 | 0.041069 |
| Neuron projection terminus                           | 147  | 9  | 2.813857801 | 0.044432 |
| Ion channel complex                                  | 324  | 15 | 2.127762843 | 0.045651 |
| Basement membrane                                    | 97   | 7  | 3.316677752 | 0.045814 |
| Catenin complex                                      | 33   | 4  | 5.57086999  | 0.046928 |
| Basal plasma membrane                                | 265  | 13 | 2.254625685 | 0.047111 |

**Supplementary Table 6.** Gene Ontology Cellular Component enrichment analysis of DEGs in sporadic versus controls. The table lists significantly enriched pathways, the number of genes in each pathway, the actual number of DEGs in the pathway, fold enrichment, and the Benjamini-Hochberg adjusted FDR p-values (q-values). Pathways are ordered by statistical significance.

| enrichment_GO_upregulated_CC_sPD         |       |      |             |          |
|------------------------------------------|-------|------|-------------|----------|
| Pathway                                  | Total | Hits | Enrichment  | FDR      |
| Collagen-containing extracellular matrix | 446   | 18   | 3.739910314 | 0.000838 |
| External encapsulating structure         | 601   | 20   | 3.083749307 | 0.001366 |
| Extracellular matrix                     | 600   | 20   | 3.088888889 | 0.001366 |
| Plasma membrane region                   | 1323  | 28   | 1.961199295 | 0.057905 |
| Synaptic vesicle                         | 213   | 8    | 3.480438185 | 0.111835 |
| Neuron projection                        | 1444  | 28   | 1.796860572 | 0.111835 |

**Supplementary Table 7.** Upregulated Gene Ontology Cellular Component in sporadic versus controls. Enriched Cellular Components for upregulated genes with layout as Supplementary Table 6.

| enrichment_kegg_sPD                             |       |      |            |          |
|-------------------------------------------------|-------|------|------------|----------|
| Pathway                                         | Total | Hits | Enrichment | FDR      |
| Steroid biosynthesis                            | 20    | 6    | 13.7879    | 0.000859 |
| Protein digestion and absorption                | 103   | 10   | 4.462105   | 0.011724 |
| Neuroactive ligand-receptor interaction         | 350   | 19   | 2.494954   | 0.018706 |
| Arrhythmogenic right ventricular cardiomyopathy | 77    | 8    | 4.775031   | 0.018706 |
| Metabolic pathways                              | 1527  | 53   | 1.595195   | 0.029583 |
| Hypertrophic cardiomyopathy                     | 90    | 8    | 4.085305   | 0.035943 |
| Nicotinate and nicotinamide metabolism          | 35    | 5    | 6.565668   | 0.036069 |
| Terpenoid backbone biosynthesis                 | 22    | 4    | 8.356305   | 0.039046 |
| AMPK signaling pathway                          | 120   | 9    | 3.446976   | 0.039046 |
| Dilated cardiomyopathy                          | 96    | 7    | 3.351226   | 0.139387 |

**Supplementary Table 8.** KEGG pathway enrichment analysis of DEGs showing dysregulated pathways in sporadic versus controls. Enriched Cellular Components for upregulated genes with layout as Supplementary Table 6.

| enrichment_GO_BP_sPD                                     |       |      |             |          |
|----------------------------------------------------------|-------|------|-------------|----------|
| Pathway                                                  | Total | Hits | Enrichment  | FDR      |
| Cholesterol biosynthetic process                         | 59    | 13   | 10.12670858 | 8.99E-07 |
| Secondary alcohol biosynthetic process                   | 59    | 13   | 10.12670858 | 8.99E-07 |
| Sterol biosynthetic process                              | 66    | 13   | 9.052663734 | 2.64E-06 |
| Circulatory system development                           | 1127  | 55   | 2.242930131 | 2.59E-05 |
| Cell adhesion                                            | 1639  | 70   | 1.962890433 | 4.16E-05 |
| Biological adhesion                                      | 1646  | 70   | 1.954542782 | 4.16E-05 |
| Extracellular matrix organization                        | 450   | 30   | 3.063978495 | 4.16E-05 |
| Extracellular structure organization                     | 451   | 30   | 3.057184751 | 4.16E-05 |
| Supramolecular fiber organization                        | 919   | 47   | 2.350494928 | 4.16E-05 |
| External encapsulating structure organization            | 454   | 30   | 3.036983089 | 4.33E-05 |
| Central nervous system development                       | 1105  | 52   | 2.162808349 | 6.85E-05 |
| Generation of neurons                                    | 1624  | 68   | 1.92441999  | 6.85E-05 |
| Lipid biosynthetic process                               | 838   | 43   | 2.358312803 | 8.08E-05 |
| Export from cell                                         | 1545  | 65   | 1.933578662 | 9.24E-05 |
| Regulation of neurotransmitter receptor activity         | 88    | 12   | 6.267228739 | 0.000159 |
| Anatomical structure formation involved in morphogenesis | 1183  | 53   | 2.059055709 | 0.000179 |
| Alcohol biosynthetic process                             | 145   | 15   | 4.754449388 | 0.000197 |
| Organic hydroxy compound biosynthetic process            | 250   | 20   | 3.676774194 | 0.000197 |
| Cholesterol metabolic process                            | 146   | 15   | 4.721884666 | 0.000204 |
| Secretion                                                | 1636  | 66   | 1.854119016 | 0.000226 |
| Head development                                         | 856   | 42   | 2.255030901 | 0.000226 |
| Sterol metabolic process                                 | 169   | 16   | 4.351212063 | 0.000228 |
| Neuron differentiation                                   | 1473  | 61   | 1.90328603  | 0.000232 |
| Neurogenesis                                             | 1757  | 69   | 1.804904805 | 0.000273 |
| Brain development                                        | 811   | 40   | 2.266815162 | 0.000295 |
| Secretion by cell                                        | 1489  | 61   | 1.882834333 | 0.000295 |
| Locomotion                                               | 1982  | 75   | 1.739140165 | 0.000317 |
| Secondary alcohol metabolic process                      | 156   | 15   | 4.419199752 | 0.000322 |
| Collagen fibril organization                             | 121   | 13   | 4.937816582 | 0.000441 |
| Lipid metabolic process                                  | 1555  | 62   | 1.832475884 | 0.000498 |
| Regulation of transport                                  | 1910  | 72   | 1.7325114   | 0.000528 |
| Vasculature development                                  | 748   | 37   | 2.273406503 | 0.000562 |
| Forebrain development                                    | 411   | 25   | 2.795600816 | 0.000699 |
| Regulation of secretion by cell                          | 611   | 32   | 2.407053482 | 0.000773 |
| Cellular lipid metabolic process                         | 1178  | 50   | 1.950750315 | 0.000799 |
| Response to endogenous stimulus                          | 1769  | 67   | 1.740700049 | 0.000898 |
| Response to organonitrogen compound                      | 1121  | 48   | 1.967943369 | 0.000922 |
| Regulation of locomotion                                 | 1056  | 46   | 2.002031403 | 0.000922 |
| Cell-cell signaling                                      | 1885  | 70   | 1.706725421 | 0.000953 |
| Regulation of cellular component movement                | 1092  | 47   | 1.978117984 | 0.000953 |
| Tube development                                         | 1094  | 47   | 1.974501681 | 0.00097  |
| Trans-synaptic signaling                                 | 776   | 37   | 2.191376372 | 0.000981 |
| Blood vessel development                                 | 717   | 35   | 2.243498898 | 0.001027 |
| Neuron development                                       | 1203  | 50   | 1.910211032 | 0.001124 |
| Steroid biosynthetic process                             | 202   | 16   | 3.640370489 | 0.001137 |



|                                                                    |      |    |             |          |
|--------------------------------------------------------------------|------|----|-------------|----------|
| Cell motility                                                      | 1776 | 66 | 1.707960985 | 0.001496 |
| Localization of cell                                               | 1776 | 66 | 1.707960985 | 0.001496 |
| Chemical synaptic transmission                                     | 767  | 36 | 2.157168692 | 0.001537 |
| Anterograde trans-synaptic signaling                               | 767  | 36 | 2.157168692 | 0.001537 |
| Regulation of plasma membrane bounded cell projection organization | 644  | 32 | 2.283710679 | 0.001537 |
| Response to nitrogen compound                                      | 1231 | 50 | 1.866761877 | 0.001788 |
| Response to organic cyclic compound                                | 1034 | 44 | 1.955730954 | 0.001874 |
| Small molecule biosynthetic process                                | 623  | 31 | 2.286918138 | 0.001874 |
| Positive regulation of developmental process                       | 1373 | 54 | 1.8075911   | 0.001874 |
| Muscle structure development                                       | 627  | 31 | 2.272328549 | 0.002071 |
| Synaptic signaling                                                 | 815  | 37 | 2.086512963 | 0.002147 |
| Regulation of cell motility                                        | 1010 | 43 | 1.956699138 | 0.002147 |
| Regulation of cell projection organization                         | 661  | 32 | 2.224976819 | 0.002188 |
| Regulation of cation channel activity                              | 197  | 15 | 3.499467824 | 0.002603 |
| Regulation of secretion                                            | 670  | 32 | 2.195089071 | 0.002749 |
| Response to oxygen-containing compound                             | 1832 | 66 | 1.655752571 | 0.003029 |
| Cholesterol biosynthetic process via desmosterol                   | 4    | 3  | 34.46975806 | 0.003378 |
| Cholesterol biosynthetic process via lathosterol                   | 4    | 3  | 34.46975806 | 0.003378 |
| Hindbrain development                                              | 160  | 13 | 3.73422379  | 0.004139 |
| Regulation of ion transmembrane transporter activity               | 282  | 18 | 2.933596431 | 0.004139 |
| Cellular component morphogenesis                                   | 815  | 36 | 2.03012072  | 0.004139 |
| Tube morphogenesis                                                 | 886  | 38 | 1.971182553 | 0.004717 |
| Organophosphate metabolic process                                  | 1121 | 45 | 1.844946908 | 0.004743 |
| Muscle organ development                                           | 340  | 20 | 2.703510436 | 0.004785 |
| Regulation of neuron projection development                        | 453  | 24 | 2.434949797 | 0.004785 |
| Blood vessel morphogenesis                                         | 635  | 30 | 2.171323343 | 0.004987 |
| Fluid transport                                                    | 33   | 6  | 8.356304985 | 0.005076 |
| Regulation of system process                                       | 606  | 29 | 2.199390504 | 0.005116 |
| Animal organ morphogenesis                                         | 1133 | 45 | 1.825406429 | 0.005506 |
| Cell migration                                                     | 1590 | 58 | 1.676516535 | 0.005506 |
| Regulation of transmembrane transporter activity                   | 293  | 18 | 2.823461411 | 0.005795 |
| Heart development                                                  | 583  | 28 | 2.207325845 | 0.006066 |
| Cartilage condensation                                             | 22   | 5  | 10.44538123 | 0.006273 |
| Neuron projection development                                      | 1045 | 42 | 1.847183207 | 0.00703  |
| Ion transport                                                      | 1720 | 61 | 1.629965304 | 0.007196 |
| Regulation of cell migration                                       | 946  | 39 | 1.894743572 | 0.007196 |
| Water transport                                                    | 23   | 5  | 9.991234222 | 0.007398 |
| Telencephalon development                                          | 274  | 17 | 2.851512833 | 0.007398 |
| Regulation of ion transmembrane transport                          | 533  | 26 | 2.241935484 | 0.007708 |
| Intestinal epithelial cell development                             | 13   | 4  | 14.14143921 | 0.008415 |
| Regulation of transporter activity                                 | 306  | 18 | 2.703510436 | 0.008841 |
| Regulation of membrane potential                                   | 451  | 23 | 2.343841642 | 0.009447 |
| Regulation of ion transport                                        | 763  | 33 | 1.987771107 | 0.009447 |
| Regulation of lipid metabolic process                              | 394  | 21 | 2.449627477 | 0.009713 |
| Muscle tissue development                                          | 394  | 21 | 2.449627477 | 0.009713 |
| Proteoglycan metabolic process                                     | 92   | 9  | 4.4960554   | 0.010243 |
| Cell aggregation                                                   | 25   | 5  | 9.191935484 | 0.010243 |

|                                                                                             |      |    |             |          |
|---------------------------------------------------------------------------------------------|------|----|-------------|----------|
| Regulation of cell adhesion                                                                 | 837  | 35 | 1.92185031  | 0.010668 |
| Negative regulation of response to stimulus                                                 | 1940 | 66 | 1.563576654 | 0.010668 |
| Negative regulation of protein targeting to mitochondrion                                   | 6    | 3  | 22.97983871 | 0.010815 |
| Regulation of cation transmembrane transport                                                | 399  | 21 | 2.41893039  | 0.010815 |
| Cell adhesion mediated by integrin                                                          | 74   | 8  | 4.968613775 | 0.011004 |
| Plasma membrane bounded cell projection organization                                        | 1649 | 58 | 1.616532014 | 0.011004 |
| Cellular response to endogenous stimulus                                                    | 1505 | 54 | 1.649051549 | 0.011226 |
| Cell projection organization                                                                | 1690 | 59 | 1.604509448 | 0.011519 |
| Striated muscle tissue development                                                          | 376  | 20 | 2.444663693 | 0.01256  |
| Metencephalon development                                                                   | 117  | 10 | 3.928177557 | 0.01256  |
| Response to growth factor                                                                   | 750  | 32 | 1.960946237 | 0.012831 |
| Regulation of transmembrane transport                                                       | 622  | 28 | 2.068924385 | 0.013116 |
| Anterior/posterior pattern specification                                                    | 214  | 14 | 3.006707869 | 0.013346 |
| Cell part morphogenesis                                                                     | 721  | 31 | 1.976074896 | 0.013617 |
| Regionalization                                                                             | 352  | 19 | 2.480778043 | 0.013837 |
| Steroid metabolic process                                                                   | 352  | 19 | 2.480778043 | 0.013837 |
| Modulation of chemical synaptic transmission                                                | 470  | 23 | 2.249090597 | 0.013837 |
| Regulation of trans-synaptic signaling                                                      | 471  | 23 | 2.244315458 | 0.014085 |
| Ossification                                                                                | 416  | 21 | 2.32007987  | 0.016364 |
| Phospholipid metabolic process                                                              | 479  | 23 | 2.20683211  | 0.017528 |
| Cell projection morphogenesis                                                               | 704  | 30 | 1.958508981 | 0.018471 |
| Organic hydroxy compound metabolic process                                                  | 607  | 27 | 2.04433491  | 0.018471 |
| Angiogenesis                                                                                | 544  | 25 | 2.112117528 | 0.018525 |
| Visual learning                                                                             | 45   | 6  | 6.127956989 | 0.018586 |
| Glycerolipid metabolic process                                                              | 484  | 23 | 2.184034258 | 0.019319 |
| Positive regulation of transport                                                            | 1013 | 39 | 1.769424896 | 0.019319 |
| Response to lipoprotein particle                                                            | 30   | 5  | 7.659946237 | 0.019319 |
| Behavior                                                                                    | 611  | 27 | 2.030951375 | 0.019413 |
| Cell morphogenesis                                                                          | 1085 | 41 | 1.736725138 | 0.019607 |
| Cytoskeleton organization                                                                   | 1553 | 54 | 1.598082795 | 0.019607 |
| Chondrocyte development                                                                     | 31   | 5  | 7.412851197 | 0.021666 |
| CGMP-mediated signaling                                                                     | 31   | 5  | 7.412851197 | 0.021666 |
| G protein-coupled receptor signaling pathway, coupled to cyclic nucleotide second messenger | 65   | 7  | 4.949503722 | 0.021893 |
| Low-density lipoprotein particle remodeling                                                 | 18   | 4  | 10.21326165 | 0.022283 |
| Alcohol metabolic process                                                                   | 403  | 20 | 2.280877291 | 0.02432  |
| Cellular response to lipoprotein particle stimulus                                          | 32   | 5  | 7.181199597 | 0.024435 |
| Cellular response to growth factor stimulus                                                 | 722  | 30 | 1.909681887 | 0.024485 |
| Cerebellum development                                                                      | 109  | 9  | 3.79483575  | 0.025718 |
| Positive regulation of cell differentiation                                                 | 897  | 35 | 1.79329845  | 0.027101 |
| Visual behavior                                                                             | 50   | 6  | 5.51516129  | 0.029078 |
| Circulatory system process                                                                  | 632  | 27 | 1.963467232 | 0.029199 |
| Regulation of cell differentiation                                                          | 1738 | 58 | 1.533752181 | 0.029819 |
| Regulation of signaling receptor activity                                                   | 211  | 13 | 2.831638893 | 0.029859 |
| Plasma membrane bounded cell projection morphogenesis                                       | 700  | 29 | 1.904043779 | 0.029859 |
| Positive regulation of cholesterol esterification                                           | 9    | 3  | 15.31989247 | 0.030065 |
| Cardiac muscle cell development                                                             | 70   | 7  | 4.595967742 | 0.031113 |

|                                                                               |      |    |             |          |
|-------------------------------------------------------------------------------|------|----|-------------|----------|
| Positive regulation of cellular component organization                        | 1192 | 43 | 1.657941383 | 0.032158 |
| Pallium development                                                           | 188  | 12 | 2.933596431 | 0.033225 |
| Developmental growth                                                          | 640  | 27 | 1.938923891 | 0.033225 |
| Organophosphate catabolic process                                             | 163  | 11 | 3.101573323 | 0.033736 |
| Cardiac muscle tissue development                                             | 215  | 13 | 2.778957239 | 0.033736 |
| Protein phosphorylation                                                       | 1678 | 56 | 1.533815218 | 0.034035 |
| Negative regulation of G1/S transition of mitotic cell cycle                  | 115  | 9  | 3.59684432  | 0.034035 |
| Locomotory behavior                                                           | 191  | 12 | 2.887519    | 0.036817 |
| Regulation of exocytosis                                                      | 219  | 13 | 2.728200029 | 0.037593 |
| Signal release                                                                | 518  | 23 | 2.040680658 | 0.037593 |
| Sterol import                                                                 | 10   | 3  | 13.78790323 | 0.037593 |
| Wound healing                                                                 | 583  | 25 | 1.970826647 | 0.037593 |
| Cholesterol import                                                            | 10   | 3  | 13.78790323 | 0.037593 |
| Sensory organ morphogenesis                                                   | 274  | 15 | 2.516040735 | 0.037593 |
| Cellular response to oxidised low-density lipoprotein particle stimulus       | 10   | 3  | 13.78790323 | 0.037593 |
| Negative regulation of establishment of protein localization to mitochondrion | 10   | 3  | 13.78790323 | 0.037593 |
| Negative regulation of cell cycle G1/S phase transition                       | 118  | 9  | 3.505399125 | 0.038115 |
| Response to wounding                                                          | 718  | 29 | 1.856310091 | 0.038206 |
| Muscle organ morphogenesis                                                    | 74   | 7  | 4.347537053 | 0.038206 |
| Positive regulation of cell projection organization                           | 365  | 18 | 2.26650464  | 0.038792 |
| Regulation of cellular component biogenesis                                   | 1032 | 38 | 1.692313703 | 0.038792 |
| Pattern specification process                                                 | 460  | 21 | 2.098159187 | 0.041031 |
| Cellular carbohydrate metabolic process                                       | 308  | 16 | 2.38751571  | 0.041258 |
| Cardiac cell development                                                      | 76   | 7  | 4.233128183 | 0.043236 |
| Pre-B cell allelic exclusion                                                  | 3    | 2  | 30.63978495 | 0.044712 |
| Lymphatic endothelial cell fate commitment                                    | 3    | 2  | 30.63978495 | 0.044712 |
| Regulation of kainate selective glutamate receptor activity                   | 3    | 2  | 30.63978495 | 0.044712 |
| Intestinal epithelial cell differentiation                                    | 23   | 4  | 7.992987377 | 0.044908 |
| Actin filament organization                                                   | 467  | 21 | 2.066709263 | 0.04674  |
| Visual perception                                                             | 227  | 13 | 2.632052011 | 0.04674  |
| Regulation of NMDA receptor activity                                          | 39   | 5  | 5.892266336 | 0.04674  |
| Regulation of nervous system process                                          | 149  | 10 | 3.084542109 | 0.049896 |

**Supplementary Table 9** Gene Ontology Biological Processes enrichment analysis of DEGs in sporadic versus controls. Enriched Cellular Components for upregulated genes with layout as Supplementary Table 6.

| enrichment_GO_MF_sPD                                                    |       |      |             |          |
|-------------------------------------------------------------------------|-------|------|-------------|----------|
| Pathway                                                                 | Total | Hits | Enrichment  | FDR      |
| Extracellular matrix structural constituent                             | 186   | 21   | 5.188995838 | 7.81E-07 |
| Extracellular matrix structural constituent conferring tensile strength | 45    | 8    | 8.170609319 | 0.002426 |
| Structural molecule activity                                            | 784   | 36   | 2.110393351 | 0.005572 |
| Lipid binding                                                           | 811   | 37   | 2.096804025 | 0.005572 |
| Calcium ion binding                                                     | 770   | 35   | 2.089076246 | 0.007124 |
| Phosphatidylinositol-5-phosphate binding                                | 20    | 5    | 11.48991935 | 0.009065 |
| Phosphotransferase activity, alcohol group as acceptor                  | 742   | 33   | 2.04402878  | 0.012828 |
| Kinase activity                                                         | 848   | 35   | 1.896920648 | 0.029172 |
| Cell adhesion molecule binding                                          | 577   | 26   | 2.070973333 | 0.044748 |
| Integrin binding                                                        | 152   | 11   | 3.326029287 | 0.04622  |
| Lysophosphatidic acid binding                                           | 8     | 3    | 17.23487903 | 0.04622  |

**Supplementary Table 10.** Gene Ontology Molecular Function enrichment analysis of DEGs in sporadic versus controls. Enriched Cellular Components for upregulated genes with layout as Supplementary Table 6.

| Code     | Mutation           | Gender | age |
|----------|--------------------|--------|-----|
| JS48753  | GBA1 E326K         | M      | 59  |
| MB240649 | GBA1 E326K         | M      | 63  |
| CK290347 | GBA1 E326K (HomoZ) | M      | 65  |
| Control1 |                    | M      | 71  |
| Control2 |                    | M      | 43  |
| Control3 |                    | F      | 66  |
| sPD 1    |                    | M      | 51  |
| sPD 2    |                    | M      | 55  |
| sPD 3    |                    | M      | 46  |
| sPD 4    |                    | M      | 65  |

**Supplementary Table 11.** A description of PD patients and controls that participated in the study.



| <b>Enriched_CC_sPD</b>                     |                      |        |               |                 |
|--------------------------------------------|----------------------|--------|---------------|-----------------|
| Pathway                                    | Enrichment FDR       | nGenes | Pathway Genes | Fold Enrichment |
| Neuron projection                          | 5.29473030811923e-08 | 71     | 1444          | 2.259790233     |
| External encapsulating structure           | 2.11690474787198e-07 | 39     | 601           | 2.982408352     |
| Extracellular matrix                       | 2.11690474787198e-07 | 39     | 600           | 2.987379032     |
| Synapse                                    | 2.11690474787198e-07 | 68     | 1443          | 2.165806005     |
| Collagen-containing extracellular matrix   | 4.86618297337138e-07 | 32     | 446           | 3.297555331     |
| Receptor complex                           | 1.95233736374745e-05 | 28     | 422           | 3.04945727      |
| Plasma membrane region                     | 2.52289546973582e-05 | 58     | 1323          | 2.014861142     |
| Integral component of plasma membrane      | 3.21771471059385e-05 | 74     | 1881          | 1.808089383     |
| Intrinsic component of plasma membrane     | 3.77688878259881e-05 | 76     | 1965          | 1.77757531      |
| Synaptic membrane                          | 4.94196055440749e-05 | 26     | 401           | 2.979929209     |
| Postsynapse                                | 5.49151847425893e-05 | 36     | 682           | 2.426024028     |
| Somatodendritic compartment                | 9.17552470013141e-05 | 43     | 913           | 2.164585026     |
| Postsynaptic membrane                      | 0.000111842          | 21     | 297           | 3.249674161     |
| Plasma membrane signaling receptor complex | 0.000236805          | 16     | 194           | 3.790488859     |
| Postsynaptic specialization membrane       | 0.000514373          | 12     | 121           | 4.557984537     |
| Fibrillar collagen trimer                  | 0.000544             | 5      | 16            | 14.36239919     |
| AMPA glutamate receptor complex            | 0.000544             | 6      | 26            | 10.6060794      |
| Banded collagen fibril                     | 0.000544             | 5      | 16            | 14.36239919     |
| Synaptic vesicle                           | 0.000563779          | 16     | 213           | 3.452370135     |
| Neuronal cell body                         | 0.000563779          | 28     | 535           | 2.405366295     |
| Axon                                       | 0.000641308          | 33     | 691           | 2.194890528     |
| Postsynaptic specialization                | 0.000767229          | 22     | 376           | 2.689130062     |

| Enriched_CC_GBA1                           |                |        |               |                 |
|--------------------------------------------|----------------|--------|---------------|-----------------|
| Pathway                                    | Enrichment FDR | nGenes | Pathway Genes | Fold Enrichment |
| External encapsulating structure           | 0.000778125    | 36     | 601           | 2.334161014     |
| Extracellular matrix                       | 0.000778125    | 36     | 600           | 2.338051282     |
| Endoplasmic reticulum lumen                | 0.006597521    | 22     | 328           | 2.613675214     |
| Basal plasma membrane                      | 0.006597521    | 19     | 265           | 2.793897758     |
| Internode region of axon                   | 0.006597521    | 3      | 4             | 29.22564103     |
| Receptor complex                           | 0.006597521    | 26     | 422           | 2.400842549     |
| Collagen trimer                            | 0.006988459    | 11     | 105           | 4.082311762     |
| Podosome                                   | 0.009318753    | 6      | 33            | 7.085003885     |
| Basal part of cell                         | 0.009318753    | 19     | 283           | 2.616194014     |
| Plasma membrane signaling receptor complex | 0.009318753    | 15     | 194           | 3.012952683     |
| Glutamatergic synapse                      | 0.009318753    | 22     | 358           | 2.394652151     |
| Collagen-containing extracellular matrix   | 0.012199488    | 25     | 446           | 2.184278104     |
| Postsynapse                                | 0.018865127    | 33     | 682           | 1.885525227     |
| Basolateral plasma membrane                | 0.020220106    | 16     | 240           | 2.597834758     |
| Synapse                                    | 0.020220106    | 58     | 1443          | 1.56626212      |
| Basement membrane                          | 0.029145175    | 9      | 97            | 3.61554322      |
| Intrinsic component of plasma membrane     | 0.029145175    | 73     | 1965          | 1.447648377     |
| Neuron projection                          | 0.029145175    | 57     | 1444          | 1.538191633     |
| Integrin complex                           | 0.037748097    | 5      | 32            | 6.088675214     |
| Basement membrane collagen trimer          | 0.037748097    | 3      | 9             | 12.98917379     |
| Plasma membrane region                     | 0.043672287    | 52     | 1323          | 1.531603259     |
| Integral component of plasma membrane      | 0.045396107    | 69     | 1881          | 1.429430608     |

**Supplementary Table 12.** The top 22 dysregulated pathways in DA neurons derived from PD patients with E326K-*GBA1* mutations compared to control DA neurons and from sPD patients compared to control neurons. The highlighted pathways are shared between these 2 PD groups.

| <b>DEGs_GBA1</b> |                    |
|------------------|--------------------|
| <b>Gene ID</b>   | <b>Fold change</b> |
| FZD10-AS1        | -6.219631314       |
| TMEM132D         | -4.859769902       |
| FZD10            | -4.783255274       |
| A2M              | -3.148072168       |
| LINC02228        | -3.015944299       |
| ZFP42            | -2.840491192       |
| LINC00906        | -2.78224874        |
| PTH2R            | -2.66523942        |
| STYXL2           | -2.651384589       |
| TLX1             | -2.607025957       |
| IGF2-AS          | -2.595644756       |
| IGF2             | -2.592744497       |
| XAF1             | -2.55996299        |
| PTPRC            | -2.540601438       |
| A2M-AS1          | -2.535904127       |
| FGF10-AS1        | -2.509438847       |
| ASNSP1           | -2.498889595       |
| PRAL             | -2.483678851       |
| NECTIN3-AS1      | -2.478304297       |
| HRH1             | -2.462200449       |
| DGAT2L6          | -2.368540165       |
| LINC02211        | -2.323216726       |
| HLA-F            | -2.275000152       |
| FOXD2            | -2.244346811       |
| NT5E             | -2.235040009       |
| KLHL41           | -2.204416616       |
| FGF10            | -2.149258651       |
| SGCG             | -2.14685133        |
| RPL23P8          | -2.13322205        |
| IL6              | -2.099670388       |
| PTPRT-DT         | -2.086833539       |
| VCAM1            | -2.016045756       |
| GDA              | -2.013158691       |
| THORLNC          | -1.970951235       |
| CTHRC1           | -1.965397986       |
| PTPRT            | -1.953346799       |
| STRIT1           | -1.951272205       |
| DAPK2            | -1.946777879       |
| UNC5B            | -1.945272034       |
| ADAM32           | -1.940112185       |
| SEMA3D           | -1.930448139       |
| INSRR            | -1.912759731       |
| C4A              | -1.907964261       |
| PTPRE            | -1.906169695       |
| F2RL1            | -1.889008801       |
| B3GNT7           | -1.866717125       |

|           |              |
|-----------|--------------|
| LRRK1     | -1.866392781 |
| RPL10P6   | -1.863297619 |
| COX20P1   | -1.859845782 |
| SFRP4     | -1.84819034  |
| CDCP1     | -1.845022405 |
| TMEM158   | -1.842429288 |
| TNFRSF9   | -1.824689378 |
| MMP1      | -1.812595383 |
| COL15A1   | -1.808055739 |
| RBM46     | -1.807043227 |
| PTGDS     | -1.785274479 |
| WNT2      | -1.783946321 |
| IL20RA    | -1.772177062 |
| DES       | -1.770689366 |
| TBX15     | -1.762615346 |
| SCRG1     | -1.756716631 |
| LAMC3     | -1.752563202 |
| RNASE1    | -1.752115388 |
| LGALS3    | -1.744625635 |
| AGAP7P    | -1.739069066 |
| AGT       | -1.71487689  |
| HPR       | -1.711794996 |
| RUNX1     | -1.710864359 |
| SOCS3     | -1.706667366 |
| HS3ST3A1  | -1.705258479 |
| IFI16     | -1.700997257 |
| ARHGEF35  | -1.694218364 |
| MMP13     | -1.692793713 |
| FBXO32    | -1.692586413 |
| HGF       | -1.690364272 |
| A2MP1     | -1.690357751 |
| TBX18     | -1.68746758  |
| TNN       | -1.681277771 |
| GDF15     | -1.673786631 |
| CAPN6     | -1.659344504 |
| YPEL3-DT  | -1.657204238 |
| TRIB3     | -1.652090576 |
| SBSPON    | -1.644278256 |
| TBC1D3E   | -1.644088511 |
| MAP1LC3C  | -1.644012575 |
| A4GALT    | -1.64338875  |
| PCK1      | -1.634363994 |
| TMPRSS2   | -1.62551905  |
| MTND4P12  | -1.623316346 |
| ALPK3     | -1.620217827 |
| DIRAS3    | -1.607924332 |
| SDR42E1   | -1.60586017  |
| LINC02485 | -1.604715608 |

|              |              |
|--------------|--------------|
| CAV2         | -1.600047883 |
| SPHK1        | -1.593519206 |
| ALDH1A3      | -1.588467969 |
| LINC01139    | -1.588065053 |
| F11          | -1.572862499 |
| SAT1         | -1.565064385 |
| ADA2         | -1.563332311 |
| KLF2         | -1.558730704 |
| JUNB         | -1.550562881 |
| FKBP5        | -1.548827984 |
| ALDH1A3-AS1  | -1.546500117 |
| SUCNR1       | -1.544198872 |
| C4B          | -1.541712006 |
| FOXQ1        | -1.538332267 |
| SYCP1        | -1.529669732 |
| HS3ST3B1     | -1.526628855 |
| MCOLN2       | -1.526109149 |
| GLIPR1L2     | -1.523679277 |
| ARHGEF35-AS1 | -1.516681315 |
| FOXC1        | -1.514632504 |
| PAPLN        | -1.509098203 |
| FOXD2-AS1    | -1.508280354 |
| KIAA1755     | -1.504995339 |
| CDH5         | -1.501440324 |
| OSMR         | -1.49122776  |
| NPFFR2       | -1.484316397 |
| CD34         | -1.483637984 |
| VSX2         | -1.482646024 |
| SSXP10       | -1.482480342 |
| LSP1         | -1.481698407 |
| RGPD2        | -1.481391556 |
| CAV1         | -1.481013048 |
| PRR15        | -1.471211272 |
| INSYN2A      | -1.469845511 |
| ITGA7        | -1.466312435 |
| NCBP2L       | -1.461659463 |
| LINC00390    | -1.4607363   |
| RAP1AP       | -1.459806336 |
| ADGRA3P1     | -1.449499606 |
| IL4R         | -1.44843203  |
| MYH14        | -1.444790275 |
| RUBCNL       | -1.437618479 |
| ZNF623       | -1.429094737 |
| LCNL1        | -1.42534735  |
| RUNX2        | -1.418852375 |
| ARHGAP36     | -1.418491759 |
| AFAP1L1      | -1.413198147 |
| PTP4A3       | -1.405668344 |



|             |              |
|-------------|--------------|
| HAP1        | -1.405575021 |
| SLC29A1     | -1.404184645 |
| BHLHE40-AS1 | -1.3901367   |
| STEAP1      | -1.383345606 |
| F7          | -1.382258894 |
| BHLHE40     | -1.38058185  |
| PHLDA1      | -1.375706193 |
| ARSJ        | -1.372546863 |
| TSPEAR-AS1  | -1.371769586 |
| CLDN1       | -1.363833284 |
| FILIP1L     | -1.363101431 |
| HCN1        | -1.358096738 |
| GADD45B     | -1.356981014 |
| MX1         | -1.354048359 |
| ANKRD18CP   | -1.353090292 |
| MEF2C       | -1.341329208 |
| DOCK10      | -1.334838356 |
| SUNO1       | -1.332963249 |
| MYLK        | -1.332594184 |
| ELMO1       | -1.332498276 |
| CNMD        | -1.3297641   |
| GLII        | -1.323429761 |
| NIPAL2      | -1.317779028 |
| ZNF558      | -1.307281817 |
| DCN         | -1.306938862 |
| TSPEAR-AS2  | -1.304842265 |
| RNF125      | -1.304512258 |
| SYBU-AS1    | -1.301551011 |
| LIF         | -1.297989956 |
| EPCAM       | -1.295677519 |
| MIR503HG    | -1.292583657 |
| KCNH5       | -1.280794524 |
| ITGB4       | -1.270215638 |
| ARHGAP10    | -1.268827324 |
| RGS6        | -1.26485957  |
| P4HA2       | -1.256818291 |
| SLC22A8     | -1.245774459 |
| #N/A        | -1.245374393 |
| CDKN2A      | -1.245255729 |
| AKR1E2      | -1.242105046 |
| PTX3        | -1.236251695 |
| CRACDL      | -1.231009465 |
| PHYHD1      | -1.229045026 |
| WWTR1       | -1.205260662 |
| ZNF365      | -1.200267356 |
| KANSL1-AS1  | -1.195789579 |
| DIAPH2      | -1.187340199 |
| MYO16       | -1.185501917 |

|            |              |
|------------|--------------|
| CMTM8      | -1.185392341 |
| IRAK3      | -1.178317336 |
| GIPC2      | -1.174884083 |
| ZCCHC24    | -1.167123289 |
| NABP1      | -1.160952104 |
| LINC01852  | -1.155051196 |
| CA5B       | -1.152758138 |
| PHLDA1-AS1 | -1.144896158 |
| SLC12A2    | -1.143558633 |
| INE2       | -1.142855478 |
| CPA4       | -1.141814094 |
| MBP        | -1.141713588 |
| SMOX       | -1.138407613 |
| ITGB3      | -1.136664929 |
| C1S        | -1.124578595 |
| AHR        | -1.123362174 |
| HEPH       | -1.1208498   |
| NRP1       | -1.119569055 |
| RGS1       | -1.115957252 |
| KLF13      | -1.108707207 |
| EDIL3-DT   | -1.107883931 |
| GBP5       | -1.107276964 |
| WASH7P     | -1.0970009   |
| KCTD12     | -1.090862237 |
| ITGA3      | -1.086877437 |
| BEND6      | -1.086314585 |
| RHOJ       | -1.080671551 |
| UQCRFS1P1  | -1.076076892 |
| AKAP12     | -1.072856516 |
| NDNF       | -1.065976981 |
| CRPPA      | -1.06483158  |
| BCL6       | -1.063739425 |
| PNMA3      | -1.063731056 |
| RIOX2      | -1.059138423 |
| TRMT9B     | -1.059042181 |
| ULK4       | -1.058713829 |
| UBE2V1     | -1.052328214 |
| IL6ST      | -1.051598581 |
| NPIP3      | -1.041717545 |
| METTL7B    | -1.034215947 |
| MYO1D      | -1.033464857 |
| ELK3       | -1.029167254 |
| ARID5A     | -1.028020722 |
| WWTR1-AS1  | -1.015732838 |
| TAF5       | -1.014822477 |
| PRKD1      | -1.005228285 |
| CDKN2B-AS1 | -1.003298269 |
| MET        | -0.992317436 |

|            |              |
|------------|--------------|
| PWRN1      | -0.989573401 |
| CADPS      | -0.972389214 |
| GOLGA6L10  | -0.969845431 |
| MAN1C1     | -0.969157358 |
| ENDOD1     | -0.965508721 |
| FUT4       | -0.965336719 |
| SH3PXD2A   | -0.957431211 |
| PDZD2      | -0.957232722 |
| SBF2       | -0.957212719 |
| CIART      | -0.950378808 |
| MARCHF1    | -0.948706553 |
| LMCD1-AS1  | -0.944829704 |
| USP25      | -0.941413705 |
| SVIL       | -0.936467936 |
| PDE7B      | -0.929100564 |
| ABCA1      | -0.92806584  |
| SNTA1      | -0.926059963 |
| ZFX        | -0.925568866 |
| PRRG1      | -0.919114572 |
| PCSK1N     | -0.914563291 |
| COPZ2      | -0.913409449 |
| TSC22D3    | -0.909331524 |
| PDE3B      | -0.905070059 |
| PAPSS2     | -0.903941341 |
| COL4A2-AS2 | -0.896636964 |
| ELL2       | -0.889623407 |
| CUBN       | -0.884623222 |
| EIF5A2     | -0.877912936 |
| COL4A1     | -0.875603209 |
| PROX1      | -0.875393585 |
| ARID5B     | -0.875177197 |
| FGF2       | -0.87499225  |
| DCAF4      | -0.874583571 |
| UBE2Q2P2   | -0.864471475 |
| MAGI2-AS3  | -0.860330296 |
| SPIRE1     | -0.849449494 |
| ST20       | -0.849312811 |
| EPM2A      | -0.847907662 |
| LONRF1     | -0.845748952 |
| CAMK1D     | -0.840220431 |
| KICS2      | -0.839449092 |
| TFRC       | -0.838389045 |
| RDH10      | -0.828702561 |
| PIP4K2A    | -0.826577747 |
| PELI1      | -0.814307993 |
| SBF2-AS1   | -0.813391689 |
| RASSF8     | -0.809302257 |
| MID2       | -0.807799199 |

|           |              |
|-----------|--------------|
| PRELID2   | -0.803793192 |
| STK3      | -0.782924056 |
| TMEM200C  | -0.781674674 |
| CHORDC1   | -0.777497423 |
| UTP15     | -0.775809262 |
| SLC4A7    | -0.772842362 |
| RETREG1   | -0.772751272 |
| SUSD1     | -0.770097154 |
| CASC15    | -0.769311453 |
| EEA1      | -0.768026415 |
| NEDD9     | -0.767215458 |
| SPART-AS1 | -0.765407382 |
| HSPA9     | -0.764129451 |
| SUGT1P1   | -0.756940549 |
| DGKH      | -0.749693261 |
| SH3BP2    | -0.748422573 |
| IL13RA1   | -0.742253453 |
| CPNE3     | -0.741621698 |
| UACA      | -0.741047383 |
| COL4A2    | -0.740340511 |
| DDX60     | -0.739464133 |
| SH3RF1    | -0.732531371 |
| ASPH      | -0.732079301 |
| IRS2      | -0.727672295 |
| EFR3A     | -0.727245338 |
| KLHDC1    | -0.725722606 |
| MLIP      | -0.723909397 |
| MPZL3     | -0.722846812 |
| TCF7L2    | -0.719826193 |
| ALG13     | -0.719715423 |
| SNX9      | -0.713448177 |
| HYCC1     | -0.71193644  |
| STAT1     | -0.707120901 |
| SPRED1    | -0.703373541 |
| EOGT      | -0.690660275 |
| IRF1      | -0.69031641  |
| ZEB2      | -0.687045455 |
| JUND      | -0.686357486 |
| VMP1      | -0.686103937 |
| PPP2R5A   | -0.684248294 |
| TMEM65    | -0.672972361 |
| TXLNG     | -0.669471006 |
| SLFN5     | -0.667699453 |
| B3GNT9    | -0.665659096 |
| SNX14     | -0.657246013 |
| GPR155    | -0.654800804 |
| GNA13     | -0.65362053  |
| GOLGA2P7  | -0.653136518 |

|          |              |
|----------|--------------|
| DNAH9    | -0.650283197 |
| CD164    | -0.647444443 |
| UGGT2    | -0.645523949 |
| STAT3    | -0.643219805 |
| ZNF621   | -0.630360015 |
| CCSER2   | -0.630309931 |
| SIRT1    | -0.627661264 |
| HACD2    | -0.627569843 |
| SLC25A37 | -0.624416995 |
| FNIP1    | -0.623166609 |
| LRRC58   | -0.622140035 |
| OSGIN2   | -0.620970157 |
| GARIN5A  | -0.619628891 |
| C12orf75 | -0.614652142 |
| CDV3     | -0.614552357 |
| CDC42EP3 | -0.612418743 |
| RNF217   | -0.608172703 |
| ZEB2-AS1 | -0.607331073 |
| CEP85L   | -0.603203667 |
| EMC10    | -0.597707945 |
| KIF13A   | -0.597589225 |
| EVI5     | -0.59676024  |
| ZNF419   | -0.596248581 |
| CTDSP1   | -0.595210934 |
| FYCO1    | -0.59365428  |
| ACSBG1   | -0.589299169 |
| AP1AR    | -0.5851073   |
| YES1     | -0.584428721 |
| LIMS1    | -0.575404833 |
| ERO1A    | -0.57210838  |
| GLRX2    | -0.571934432 |
| TLK1     | -0.571763893 |
| MTMR10   | -0.569904245 |
| PTPN12   | -0.56810106  |
| PRMT3    | -0.564248116 |
| GBE1     | -0.563800712 |
| IDH3A    | -0.560843909 |
| PURA     | -0.559156899 |
| GALC     | -0.558715468 |
| SLC19A2  | -0.555487272 |
| SHLD2    | -0.55432177  |
| CAPRIN2  | -0.553410387 |
| KDSR     | -0.552856289 |
| FAM20C   | -0.552538371 |
| FAM91A1  | -0.533679258 |
| ARF6     | -0.532135161 |
| EIF5     | -0.531782075 |
| ALG10B   | -0.528068399 |

|         |              |
|---------|--------------|
| GCFC2   | -0.525943496 |
| PAK2    | -0.525839924 |
| TCAIM   | -0.524122731 |
| OSGEP   | -0.524044007 |
| RCL1    | -0.520608102 |
| PPP1R2  | -0.520577809 |
| CYP2U1  | -0.519584519 |
| CHMP2B  | -0.518671636 |
| PARD3   | -0.511356329 |
| DENND1B | -0.511021508 |
| DDX21   | -0.510620464 |
| RAP2B   | -0.503551471 |
| USP45   | -0.503286439 |
| RNF149  | -0.501267425 |
| ERBIN   | -0.500299746 |
| PPRC1   | -0.499999214 |
| ARFGEF2 | -0.496267488 |
| MTFMT   | -0.494604215 |
| ADO     | -0.494322115 |
| CDK13   | -0.491201694 |
| ANKRD28 | -0.487985383 |
| PPP1CB  | -0.487753834 |
| MAP4K5  | -0.485949553 |
| BEND7   | -0.484525665 |
| GOLGA5  | -0.482652886 |
| ANKRA2  | -0.482015493 |
| ABHD5   | -0.477724188 |
| TMEM33  | -0.477589683 |
| PLEKHG1 | -0.475764271 |
| PNPT1   | -0.474490469 |
| MBTPS2  | -0.474004001 |
| ZFAND5  | -0.472191999 |
| TARS3   | -0.467319326 |
| FYTTD1  | -0.466403634 |
| WASHC4  | -0.465326541 |
| TDRP    | -0.463422018 |
| ATP7B   | -0.455621562 |
| BMP2K   | -0.454828745 |
| EIF2AK2 | -0.444433725 |
| IQCB1   | -0.441952483 |
| AGA     | -0.441063721 |
| ZDHHC2  | -0.438763838 |
| PDCD6P1 | -0.433336651 |
| TJP1    | -0.431062902 |
| PTAR1   | -0.431009816 |
| ZMYND11 | -0.430026329 |
| VRK2    | -0.428601307 |
| JAK1    | -0.421571892 |

|         |              |
|---------|--------------|
| ATP13A3 | -0.419956227 |
| GNG7    | -0.418508563 |
| ME2     | -0.416676595 |
| NOC3L   | -0.416219337 |
| BTBD1   | -0.414977219 |
| USP6NL  | -0.414214831 |
| WNK1    | -0.407447833 |
| SOCS6   | -0.403896638 |
| TMEM181 | -0.399123606 |
| NCOA3   | -0.3975133   |
| PJA2    | -0.397309647 |
| ZNF275  | -0.397213393 |
| AFF4    | -0.394803043 |
| ARL13B  | -0.390445008 |
| HECTD1  | -0.388683121 |
| DAZAP1  | -0.386153194 |
| SENP6   | -0.385285592 |
| SERAC1  | -0.380654584 |
| TDRD3   | -0.3783159   |
| SH3YL1  | -0.36481801  |
| TMEM192 | -0.363827802 |
| DNAJB14 | -0.358767315 |
| DENND4C | -0.347368119 |
| SRSF6   | -0.347097487 |
| SUSD6   | -0.339637152 |
| UBE2E3  | -0.339515362 |
| ARL10   | -0.328576812 |
| RIC1    | -0.325761403 |
| DNAJC13 | -0.315993467 |
| MTDH    | -0.314205185 |
| ACBD5   | -0.313864033 |
| EVC     | -0.294416901 |
| PGM3    | -0.285045979 |
| CMTR2   | -0.221082353 |
| PSMC5   | 0.303087424  |
| MED24   | 0.326025256  |
| SGTA    | 0.365730608  |
| DNASE1  | 0.367934929  |
| AP2M1   | 0.37104587   |
| B3GNT4  | 0.372672227  |
| AP1B1   | 0.398521604  |
| FAM222B | 0.405428179  |
| RBM10   | 0.406900727  |
| PPP1R7  | 0.413907185  |
| POLR2F  | 0.416273396  |
| FNTB    | 0.428986652  |
| PLGRKT  | 0.432351741  |
| WRAP53  | 0.437488003  |

|          |             |
|----------|-------------|
| PRMT7    | 0.448412776 |
| VDAC3    | 0.44851658  |
| MOSPD3   | 0.449321736 |
| AP1M1    | 0.450464568 |
| PAFAH1B3 | 0.453625932 |
| C12orf57 | 0.467765098 |
| TUT1     | 0.477701682 |
| MRPS11   | 0.477869326 |
| HSD17B10 | 0.479747858 |
| CSE1L    | 0.486505608 |
| ELOB     | 0.48694552  |
| RAB30-DT | 0.490388278 |
| SUN2     | 0.499596777 |
| ARRB2    | 0.502028646 |
| ZNF607   | 0.506376835 |
| POP5     | 0.509643612 |
| RETSAT   | 0.511384991 |
| SDF2     | 0.522727067 |
| LMNB2    | 0.52514828  |
| NUDT2    | 0.53294289  |
| LSM3     | 0.534727091 |
| PCSK7    | 0.535716133 |
| PLCD4    | 0.538416616 |
| NDUFS5   | 0.538515141 |
| B3GNTL1  | 0.539591256 |
| PTGR3    | 0.541951009 |
| NCAPH2   | 0.543543204 |
| CDK5     | 0.549008964 |
| CPT1C    | 0.551610363 |
| PAPSS1   | 0.55351744  |
| DOC2A    | 0.559523587 |
| ATP5MC1  | 0.56159251  |
| C1orf35  | 0.563774798 |
| NAT14    | 0.567280805 |
| CCDC28B  | 0.584376614 |
| MCF2L    | 0.594088232 |
| SUFU     | 0.597121076 |
| COG4     | 0.603175292 |
| ZNF107   | 0.60459073  |
| WNK2     | 0.6049389   |
| HIRIP3   | 0.614523608 |
| CSRNP1   | 0.618639857 |
| BICDL1   | 0.63266218  |
| MZT2A    | 0.632853177 |
| CKB      | 0.635356749 |
| UBL5     | 0.640743336 |
| TOR2A    | 0.641043405 |
| GSTCD    | 0.644724906 |



|           |             |
|-----------|-------------|
| CXXC4-AS1 | 0.645259548 |
| TFPT      | 0.65509352  |
| ACYP1     | 0.66095251  |
| ADAMTS9   | 0.661734806 |
| CXXC4     | 0.67202628  |
| IP6K2     | 0.674660081 |
| PASK      | 0.678378829 |
| DDB2      | 0.680817564 |
| TMEM107   | 0.68176776  |
| IGDCC3    | 0.68881525  |
| ECH1      | 0.69290959  |
| CDH24     | 0.693512088 |
| CEP78     | 0.694491747 |
| LSM4      | 0.695251689 |
| DYNC2I2   | 0.696313797 |
| H3-3A     | 0.704047671 |
| ETHE1     | 0.712748417 |
| MCPH1-DT  | 0.712854328 |
| GPR19     | 0.716313914 |
| KANK3     | 0.736015843 |
| PLCH1     | 0.739959877 |
| DPYSL5    | 0.751777079 |
| CHST6     | 0.762072521 |
| FRG1HP    | 0.776439875 |
| TSHZ1     | 0.779634605 |
| KLHDC8A   | 0.786407706 |
| MPP2      | 0.792847734 |
| GLB1L2    | 0.801938551 |
| CELSR3    | 0.802721316 |
| FRRS1     | 0.806933271 |
| KLHL3     | 0.810848747 |
| FBXO16    | 0.814483519 |
| NUDT1     | 0.816132635 |
| CIQTNF3   | 0.823680717 |
| LINC00205 | 0.824224834 |
| TSPAN10   | 0.825270755 |
| YJEFN3    | 0.836050884 |
| CHGB      | 0.839294555 |
| ATAD5     | 0.839309665 |
| PCDHGC4   | 0.843410538 |
| CHKB-DT   | 0.843470119 |
| FAM81A    | 0.85073086  |
| UBL7-DT   | 0.850877453 |
| RRM1      | 0.857741142 |
| SPIRE2    | 0.860338417 |
| SSBP3-AS1 | 0.867280699 |
| SLC5A9    | 0.871781979 |
| LINC01719 | 0.876812863 |

|            |             |
|------------|-------------|
| PCAT1      | 0.87744432  |
| PTGR1      | 0.878019958 |
| KCNAB2     | 0.880888131 |
| TMEM163    | 0.884850745 |
| ARID3B     | 0.887229151 |
| CASC9      | 0.890719795 |
| CEP128     | 0.894809273 |
| RRM1-AS1   | 0.894857695 |
| PRIM1      | 0.915290635 |
| FXVD6-AS1  | 0.926199062 |
| SLC9A3-AS1 | 0.934243624 |
| FXVD6      | 0.935096461 |
| CASZ1      | 0.936261363 |
| THAP7-AS1  | 0.952824377 |
| WDR38      | 0.954201093 |
| ID2        | 0.957096908 |
| TMEM263-DT | 0.959225299 |
| DHRS11     | 0.960292259 |
| GABRA5     | 0.962512317 |
| SRCIN1     | 0.968731694 |
| LINC02696  | 0.970556629 |
| GPER1      | 0.984064934 |
| PEX11G     | 0.998447314 |
| FAM88B     | 0.998583126 |
| SHD        | 1.003610372 |
| UBAC2-AS1  | 1.005769217 |
| SLC9A3     | 1.007615346 |
| TLE4       | 1.008199822 |
| ADAMTSL2   | 1.011562679 |
| MYB        | 1.013000037 |
| PTPRD-AS1  | 1.01331059  |
| ST8SIA5    | 1.021298306 |
| SLC25A53   | 1.021647964 |
| BAHCC1     | 1.026365336 |
| ALMS1P1    | 1.03015414  |
| TPPP       | 1.030641092 |
| COL5A3     | 1.032804311 |
| CORO1A     | 1.035576426 |
| OXA1L-DT   | 1.039044282 |
| HSD17B8    | 1.04379869  |
| RENO1      | 1.045647236 |
| FGFR2      | 1.053011249 |
| CHST8      | 1.065894604 |
| CHRNA5     | 1.069361874 |
| ZFH4-AS1   | 1.071616332 |
| PDCD6-DT   | 1.071670804 |
| MOB3B      | 1.072466021 |
| ETFB       | 1.075425811 |

|             |             |
|-------------|-------------|
| OCA2        | 1.086399444 |
| SLC16A9     | 1.08968305  |
| ZNF503-AS2  | 1.095342742 |
| KIAA2012    | 1.097073743 |
| CCDC74B     | 1.099489334 |
| TYW1B       | 1.099962964 |
| PYGM        | 1.100957967 |
| SLC12A8     | 1.109118466 |
| BRCA2       | 1.118300883 |
| MTFR2       | 1.12118159  |
| TMEM139-AS1 | 1.124525874 |
| METTL7A     | 1.126541404 |
| RAB3C       | 1.128587282 |
| LRRN2       | 1.130762787 |
| ZNF474      | 1.137041616 |
| RPRM        | 1.138799967 |
| TBC1D22A-DT | 1.142105012 |
| ADAM8       | 1.142582485 |
| DNASE1L2    | 1.143099749 |
| TEX15       | 1.150856495 |
| S100B       | 1.151087538 |
| GALNTL6     | 1.151584905 |
| NMB         | 1.154244245 |
| RMI2        | 1.155354829 |
| DNM1P51     | 1.159450241 |
| ANKFN1      | 1.172795959 |
| MIDEAS-AS1  | 1.176782443 |
| FOXP1-DT    | 1.177054137 |
| ZNF503      | 1.178289496 |
| FXVD7       | 1.181298023 |
| LRRC37A4P   | 1.188521467 |
| TMSB15A     | 1.188783814 |
| PCSK2       | 1.210396105 |
| SRL         | 1.21075521  |
| PCSK1       | 1.216305464 |
| HGFAC       | 1.225858292 |
| RAPGEF5     | 1.229789977 |
| EPHA7       | 1.234505587 |
| IFI27       | 1.24518134  |
| ZNF367      | 1.248686259 |
| ID1         | 1.258882772 |
| ELFN2       | 1.259493435 |
| LINC03013   | 1.261273861 |
| CHRNA7      | 1.261819498 |
| AMZ1        | 1.264628057 |
| ADCYAP1R1   | 1.268261492 |
| #N/A        | 1.270972363 |
| DLL1        | 1.286477104 |

|           |             |
|-----------|-------------|
| DLL3      | 1.287024144 |
| GALNT12   | 1.290531219 |
| PKD2L2-DT | 1.291423219 |
| TAT-AS1   | 1.295681095 |
| HAS1      | 1.304106525 |
| PARPBP    | 1.310049291 |
| SLC1A1    | 1.31919809  |
| GDF5      | 1.322377235 |
| ST6GAL2   | 1.32902376  |
| RAB3B     | 1.344334032 |
| LRRC63    | 1.353392105 |
| BRINP2    | 1.353829822 |
| IRX2      | 1.354636684 |
| DDIT4L    | 1.362191761 |
| RPE65     | 1.371652959 |
| REM2      | 1.37188075  |
| GDF5-AS1  | 1.372753974 |
| TSPAN15   | 1.374141209 |
| LARGE2    | 1.374538024 |
| FHAD1     | 1.375544429 |
| A4GNT     | 1.378264805 |
| LINC01517 | 1.379027975 |
| LRRC74B   | 1.380232289 |
| SUSD2     | 1.382062928 |
| SMPDL3B   | 1.382635226 |
| FUT9      | 1.388799282 |
| ZNF528    | 1.394841792 |
| WFIKKN1   | 1.400578633 |
| LINC02593 | 1.40302091  |
| TFCP2L1   | 1.412423197 |
| DKK2      | 1.419268393 |
| SLC28A2   | 1.419441302 |
| LRRC52    | 1.421541475 |
| BMP4      | 1.424337916 |
| PTGER2    | 1.425085334 |
| MMRN2     | 1.427487313 |
| PAH       | 1.429378328 |
| PRDM16    | 1.430901872 |
| COL6A6    | 1.436645098 |
| WSCD1     | 1.441806749 |
| NOTUM     | 1.441853934 |
| MGAT4C    | 1.450530503 |
| GAS1      | 1.451652076 |
| CCBE1     | 1.458042768 |
| CACNA1S   | 1.461496943 |
| C22orf15  | 1.468136875 |
| RSPO3     | 1.477121583 |
| DACH1     | 1.478050143 |

|           |             |
|-----------|-------------|
| SEMA3F    | 1.479627194 |
| LEMD1-DT  | 1.479762302 |
| RDM1      | 1.487604821 |
| GMNC      | 1.496043394 |
| ITGB7     | 1.497122465 |
| FREM3     | 1.498269095 |
| TM4SF18   | 1.505013699 |
| ZNF560    | 1.507431847 |
| EIF2S3B   | 1.508254341 |
| MYO18B    | 1.511219796 |
| PCDHGA3   | 1.516669977 |
| RPL24P8   | 1.517467401 |
| GPSM3     | 1.517936023 |
| LINC00664 | 1.521258268 |
| AKAP3     | 1.524230516 |
| LERFS     | 1.527932826 |
| ZIC4      | 1.528043588 |
| LINC02958 | 1.530369804 |
| NRGN      | 1.535687012 |
| RNF5P1    | 1.536824571 |
| ZNF887P   | 1.541951522 |
| RD3       | 1.545007798 |
| NOSTRIN   | 1.545995421 |
| ASCL5     | 1.546157942 |
| UFL1-AS1  | 1.548372226 |
| BMP5      | 1.552259478 |
| LMX1A-AS1 | 1.556973928 |
| TRABD2A   | 1.557181029 |
| ADAMTS17  | 1.557913675 |
| CHRND     | 1.559994773 |
| KLF2P4    | 1.562049767 |
| CASQ2     | 1.564560276 |
| CXCL14    | 1.564669858 |
| BTBD17    | 1.564973159 |
| NRAP      | 1.573957394 |
| OTX2      | 1.581398786 |
| MAP3K19   | 1.581518153 |
| PRRT1B    | 1.582587784 |
| HSD11B2   | 1.587185989 |
| GALNT14   | 1.588128918 |
| LRRIQ3    | 1.590313615 |
| CARTPT    | 1.590764296 |
| NFE2      | 1.591663963 |
| TNFRSF11B | 1.592940875 |
| KLK6      | 1.594610785 |
| CA4       | 1.596179795 |
| GAS1RR    | 1.59884307  |
| URB1-AS1  | 1.59967141  |

|              |             |
|--------------|-------------|
| FAM181B      | 1.601447674 |
| SLC28A2-AS1  | 1.602480152 |
| ECEL1        | 1.603084784 |
| ZNF528-AS1   | 1.603868683 |
| LMO3         | 1.607087776 |
| ASCL1        | 1.608175811 |
| KIF19        | 1.608425964 |
| CMAHP        | 1.616048256 |
| AOC3         | 1.618241311 |
| LINC02931    | 1.620935196 |
| VIT          | 1.628970801 |
| H4C5         | 1.629543097 |
| UBE2T        | 1.636043157 |
| CAPN13       | 1.640335285 |
| COL9A1       | 1.64150153  |
| TNFSF10      | 1.648689173 |
| VGLL2        | 1.651879099 |
| FOXN4        | 1.661039334 |
| FOLR1        | 1.661816808 |
| CLIC6        | 1.668745241 |
| LINC00881    | 1.67479678  |
| GRIN2C       | 1.681736448 |
| ANKRD20A5P   | 1.690906178 |
| CKM          | 1.69207464  |
| CAPSL        | 1.697047666 |
| BARHL1       | 1.697310254 |
| POU5F1P6     | 1.704836547 |
| TNNC1        | 1.710380329 |
| NCKAP1L      | 1.721266594 |
| LINC02381    | 1.726941557 |
| GABRR1       | 1.732660927 |
| FAR2P4       | 1.751547005 |
| MKRN3        | 1.760871388 |
| MALRD1       | 1.764512849 |
| MLLT10P1     | 1.766717266 |
| ZNF454       | 1.786516418 |
| CEACAM16-AS1 | 1.798231704 |
| NR4A2        | 1.816931468 |
| MFNG         | 1.850331682 |
| RSPO2        | 1.852188983 |
| GRM6         | 1.879190326 |
| REM1         | 1.894570801 |
| DMRTA2       | 1.916509823 |
| PRDM16-DT    | 1.92337794  |
| RSPO1        | 1.926229116 |
| TNNT1        | 1.952161507 |
| NTS          | 1.957902436 |

|           |             |
|-----------|-------------|
| FMO1      | 1.965635309 |
| LINC02899 | 1.966761581 |
| WNT10B    | 1.988431292 |
| TEKT4     | 1.989213035 |
| LMX1A-AS2 | 2.015859329 |
| HERC2P3   | 2.049834175 |
| PTGS1     | 2.053927796 |
| ERMN      | 2.05520577  |
| HPD       | 2.077250236 |
| LIX1      | 2.086735672 |
| PMCH      | 2.127174261 |
| FAM66A    | 2.137090667 |
| NMU       | 2.214302231 |
| LMX1A     | 2.247914893 |
| ZNF229    | 2.360352227 |
| MED15P8   | 2.471569856 |
| GDF7      | 2.498344739 |
| CLDN19    | 2.545726835 |
| TMEM72    | 2.580516485 |
| NEK2P4    | 2.6262238   |
| PCDHGA7   | 2.690927409 |
| PLD5P1    | 2.939165402 |
| MSX1      | 2.94429728  |
| PNMA6B    | 3.130084961 |
| WNT3A     | 3.214904821 |
| NF1P8     | 3.413212737 |
| HSD17B7P2 | 3.674384193 |

| <b>DEGs sPD</b> |                    |
|-----------------|--------------------|
| <b>Gene ID</b>  | <b>Fold change</b> |
| CHL1            | -10.09932654       |
| DPP6            | -7.261566405       |
| SGCA            | -5.550136322       |
| AL591846.1      | -4.883993967       |
| AL139158.2      | -4.493436103       |
| RPS2P5          | -4.485354859       |
| HLA-C           | -4.481203518       |
| CHMP1B2P        | -4.437203192       |
| LIF-AS1         | -4.388587347       |
| AGAP7P          | -4.356916316       |
| RPL13P12        | -4.240342285       |
| FEV             | -4.110690711       |
| AC011352.3      | -3.818066064       |
| AC087457.1      | -3.781309081       |
| MTND4P12        | -3.747285337       |
| SCGB3A2         | -3.629844516       |
| TRIM22          | -3.6283473         |

|            |              |
|------------|--------------|
| AQP9       | -3.589468285 |
| EN1        | -3.487699255 |
| TEX26-AS1  | -3.290146879 |
| AC044860.1 | -3.201089395 |
| NPIP15     | -3.1890386   |
| SCN4B      | -3.187570056 |
| AC011483.2 | -3.171076748 |
| IRX6       | -3.15015361  |
| LINC01158  | -3.126499279 |
| U2AF1L5    | -3.117903895 |
| AL132709.1 | -3.090198923 |
| AC254629.1 | -3.025732698 |
| GPR132     | -3.016557361 |
| AC105105.1 | -3.00834832  |
| IGFL2-AS1  | -2.999091603 |
| HGFAC      | -2.91085576  |
| AC002454.1 | -2.867492777 |
| MIR210HG   | -2.816437961 |
| AC055716.2 | -2.790180559 |
| FUT9       | -2.758761536 |
| INPP5D     | -2.74683772  |
| LRRC37A6P  | -2.667975808 |
| AC005180.2 | -2.64143726  |
| CBSL       | -2.605556228 |
| NPTX1      | -2.604128731 |
| AL391117.1 | -2.570620216 |
| AC011511.5 | -2.548639188 |
| DIO3OS     | -2.540273733 |
| PRR27      | -2.516101713 |
| ANKRD1     | -2.496766206 |
| VGF        | -2.49641044  |
| CCL2       | -2.473125088 |
| MUC3A      | -2.469596047 |
| IRX1       | -2.460377642 |
| OTX1       | -2.433498088 |
| RSPH10B2   | -2.426600026 |
| NOMO3      | -2.399264857 |
| LINC00672  | -2.383663131 |
| AC016595.1 | -2.378425677 |
| RGS5       | -2.359900711 |
| PAPPA-AS1  | -2.355914061 |
| FST        | -2.352234936 |
| BCAN       | -2.320095002 |
| AC009139.1 | -2.315749057 |
| AL355990.1 | -2.310485601 |
| MTTP       | -2.300893775 |
| POU3F3     | -2.296037178 |
| PKD1P5     | -2.232087638 |



|               |              |
|---------------|--------------|
| TNFRSF10A-AS1 | -2.222390562 |
| LINC01943     | -2.175511522 |
| SMTNL1        | -2.154547978 |
| C16orf89      | -2.139588116 |
| ANO4          | -2.130075845 |
| KCNMB2-AS1    | -2.100330018 |
| NETO1         | -2.092741564 |
| PVT1          | -2.075536426 |
| SGCD          | -2.074995524 |
| SLC6A17       | -2.07352238  |
| CALCR         | -2.064774916 |
| PXDNL         | -2.06050137  |
| PII5          | -2.051249719 |
| AC004264.1    | -2.050869626 |
| AC015909.1    | -2.048259648 |
| ELMOD1        | -2.045665522 |
| PDE1A         | -2.041611256 |
| CSPG4P12      | -2.03480753  |
| HMGCS1        | -2.03257476  |
| AC144831.1    | -2.029387224 |
| CXCL12        | -2.024493049 |
| IRX5          | -2.02045371  |
| LIF           | -1.984773373 |
| PTPRN2        | -1.983603017 |
| BEGAIN        | -1.980891964 |
| PLA2G4A       | -1.978824089 |
| SH2D5         | -1.963571865 |
| LINC01759     | -1.961698635 |
| COL1A1        | -1.945449647 |
| MICA          | -1.933516953 |
| HAP1          | -1.93097035  |
| CDKN1A        | -1.927886095 |
| IL11          | -1.907252783 |
| CSGALNACT1    | -1.866990921 |
| MSMO1         | -1.857222162 |
| PLPPR5        | -1.855528627 |
| PLA2G3        | -1.843285835 |
| AC104794.2    | -1.824798326 |
| FGFBP3        | -1.805598417 |
| COL5A3        | -1.8023133   |
| AL391988.1    | -1.800162151 |
| PIK3R3        | -1.798376602 |
| AL359198.1    | -1.784816423 |
| GRID1         | -1.782390751 |
| SEL1L3        | -1.780169071 |
| AC025180.1    | -1.776504519 |
| RGS20         | -1.772849141 |

|             |              |
|-------------|--------------|
| PRPH        | -1.769439674 |
| OPRD1       | -1.768507855 |
| AC125611.4  | -1.761398721 |
| IFNLR1      | -1.757173302 |
| PRSS12      | -1.72949717  |
| COL3A1      | -1.721823726 |
| MC1R        | -1.71631781  |
| CRABP1      | -1.711591659 |
| NES         | -1.706562367 |
| GNG4        | -1.70457342  |
| AC011270.2  | -1.695426668 |
| CACNG8      | -1.685301037 |
| RNASEH1-AS1 | -1.679836698 |
| FABP7       | -1.665198131 |
| SHISA9      | -1.662730166 |
| PHLDA3      | -1.662658755 |
| ASTN1       | -1.65812269  |
| DHCR24      | -1.63496835  |
| LINC01963   | -1.62966121  |
| GPR27       | -1.629171943 |
| AC114803.1  | -1.62343718  |
| CDH11       | -1.621058031 |
| FDXR        | -1.612982999 |
| MMP17       | -1.603945554 |
| THY1        | -1.596620492 |
| TGFBI       | -1.589581439 |
| FSIP1       | -1.58753774  |
| RAB33A      | -1.58499044  |
| RPSAP44     | -1.580308988 |
| HPCAL4      | -1.578319491 |
| C1S         | -1.575633754 |
| AC020934.1  | -1.574858349 |
| FNDC10      | -1.57198275  |
| DPPA4       | -1.571981673 |
| COL14A1     | -1.566912272 |
| AC124798.1  | -1.564258496 |
| BMPR1B      | -1.56321218  |
| IGSF9B      | -1.550411317 |
| LRRC10B     | -1.53435737  |
| OPN5        | -1.534012792 |
| PDPN        | -1.52429262  |
| ALPK2       | -1.512987946 |
| AC037198.2  | -1.510716537 |
| CILP2       | -1.494585    |
| FBXO41      | -1.488949333 |
| OGDHL       | -1.486513334 |
| IGFBP3      | -1.485921773 |
| AL139384.2  | -1.484240365 |

|            |              |
|------------|--------------|
| IDI1       | -1.483853772 |
| PIM2       | -1.479586075 |
| LOXL1      | -1.478342301 |
| VWCE       | -1.478266764 |
| CLEC18B    | -1.476892742 |
| COL11A1    | -1.471653473 |
| LOXL1-AS1  | -1.469578509 |
| LIPG       | -1.468973539 |
| KCTD1      | -1.460421984 |
| NSDHL      | -1.459574747 |
| EPHA2      | -1.45451739  |
| SLC2A6     | -1.450840974 |
| PRSS35     | -1.441167471 |
| ELOVL6     | -1.440958965 |
| VWA5B2     | -1.43920959  |
| PPP2R2C    | -1.436717511 |
| CYGB       | -1.434455183 |
| HMGCR      | -1.428781748 |
| RAB3B      | -1.424346386 |
| STOM       | -1.41388375  |
| LGI2       | -1.411984232 |
| NEFL       | -1.399978283 |
| PNPLA3     | -1.396307066 |
| AC245297.3 | -1.3816229   |
| AL513217.1 | -1.368934383 |
| APOE       | -1.361654203 |
| B4GALNT1   | -1.3611952   |
| AP003396.5 | -1.344265663 |
| TFPI       | -1.340299949 |
| SCRG1      | -1.333361258 |
| CADM2      | -1.32237877  |
| AL049629.1 | -1.319494595 |
| SFRP2      | -1.318728333 |
| SYT5       | -1.314806986 |
| DHCR7      | -1.306839238 |
| LPAR1      | -1.304375862 |
| PEG10      | -1.301918514 |
| GNG11      | -1.296957963 |
| KCNK9      | -1.296483137 |
| KLHDC9     | -1.295582628 |
| AP000662.1 | -1.292912293 |
| CHRNA5     | -1.288618188 |
| AC007362.1 | -1.280824897 |
| P2RX6      | -1.274983507 |
| GRIA4      | -1.266648509 |
| EPN3       | -1.264573572 |
| FDFT1      | -1.256762581 |
| OLFM2      | -1.252720512 |

|            |              |
|------------|--------------|
| DNM3       | -1.252105967 |
| METRNL     | -1.248184263 |
| UPP1       | -1.243272055 |
| AC008734.1 | -1.233407624 |
| CCDC184    | -1.227353212 |
| GAP43      | -1.226262779 |
| PRKX       | -1.226260733 |
| ASB16-AS1  | -1.2257646   |
| CRYAB      | -1.220455784 |
| SETD9      | -1.216712213 |
| Z99774.1   | -1.205761559 |
| MIR9-3HG   | -1.205659516 |
| NCAN       | -1.203797259 |
| SQLE       | -1.199714323 |
| SOX1       | -1.188725352 |
| STARD4     | -1.187737707 |
| RFLNB      | -1.184557914 |
| CRTAC1     | -1.183784636 |
| ITGB5      | -1.17694642  |
| CDK6       | -1.173847269 |
| NCR3LG1    | -1.166390044 |
| SC5D       | -1.156916882 |
| AL592078.1 | -1.154541574 |
| PLK2       | -1.153934113 |
| SERINC2    | -1.149626657 |
| AC104365.3 | -1.14961789  |
| EHD4       | -1.143925332 |
| LHFPL6     | -1.143265446 |
| TTC9B      | -1.136757261 |
| CDK5R2     | -1.119563286 |
| AC020659.1 | -1.114818948 |
| CERKL      | -1.1123503   |
| SYNDIG1    | -1.111238361 |
| PCA3       | -1.109896138 |
| GAL3ST4    | -1.103811417 |
| SLC26A10   | -1.102736986 |
| AC092118.2 | -1.100474394 |
| POU3F2     | -1.081639757 |
| NACC2      | -1.079866458 |
| FTH1       | -1.078250413 |
| BAG3       | -1.065071073 |
| SCD        | -1.064193563 |
| MDGA1      | -1.060166007 |
| TFPI2      | -1.057420752 |
| SLC26A6    | -1.05589161  |
| ABLIM2     | -1.055037114 |
| TSPAN11    | -1.052012974 |
| KCNQ2      | -1.048006592 |

|              |              |
|--------------|--------------|
| FNDC4        | -1.042096902 |
| PRRG1        | -1.040748373 |
| AC080038.1   | -1.040402306 |
| AL929472.3   | -1.03008628  |
| LINGO1       | -1.028351207 |
| VEPH1        | -1.026801257 |
| ZNF558       | -1.021376894 |
| GNGT1        | -1.014487056 |
| CYFIP2       | -1.012945468 |
| PNP          | -1.009905801 |
| EPB41L4B     | -1.00549355  |
| PCNA         | -0.993136934 |
| AC006504.5   | -0.991318589 |
| PANK1        | -0.989626102 |
| FSTL3        | -0.987135924 |
| PRUNE2       | -0.98653575  |
| Z97832.2     | -0.981709733 |
| RNF175       | -0.97090457  |
| AC068987.4   | -0.968043506 |
| TMBIM4       | -0.966184729 |
| NALCN-AS1    | -0.961493375 |
| CALD1        | -0.957989321 |
| NETO2        | -0.955097565 |
| AL158151.1   | -0.947981453 |
| C15orf59-AS1 | -0.945188271 |
| TMEM74B      | -0.940442875 |
| NMNAT2       | -0.939853918 |
| PRCP         | -0.938688324 |
| ACSS2        | -0.937395584 |
| COTL1        | -0.936803295 |
| CSTF3        | -0.918636407 |
| TMEM97       | -0.917343232 |
| PAK1         | -0.915611954 |
| AC113383.1   | -0.909745723 |
| AL645608.1   | -0.909000468 |
| DIABLO       | -0.908648403 |
| HCFC1R1      | -0.907252338 |
| PLXNA4       | -0.901302801 |
| TENM4        | -0.892011722 |
| TANC1        | -0.888609725 |
| TP53I3       | -0.881299544 |
| RPS27L       | -0.875110384 |
| AC007319.1   | -0.875095741 |
| BDNF-AS      | -0.853268844 |
| UBE2N        | -0.848956049 |
| AC005726.5   | -0.838909221 |
| CACNG7       | -0.837746841 |
| PODXL2       | -0.83627828  |

|            |              |
|------------|--------------|
| SLC6A15    | -0.832104645 |
| SAP30L-AS1 | -0.829343103 |
| SMAP2      | -0.829187701 |
| WLS        | -0.823688395 |
| ELAVL3     | -0.822551908 |
| TIMP2      | -0.816164391 |
| EIF5A      | -0.811898729 |
| SERPINF1   | -0.811372307 |
| TREH       | -0.811162049 |
| AL121753.2 | -0.796167277 |
| NT5DC2     | -0.795376991 |
| RFTN1      | -0.783653216 |
| ACAT2      | -0.780247977 |
| AGAP2-AS1  | -0.779587886 |
| TDRKH      | -0.779034307 |
| RND2       | -0.763467102 |
| CHRM4      | -0.758370947 |
| BSCL2      | -0.755107767 |
| MMP24OS    | -0.75069641  |
| PODXL      | -0.749486138 |
| MFGE8      | -0.745173274 |
| SCAMP5     | -0.744958566 |
| GALNT17    | -0.741075179 |
| SH3BP4     | -0.736902286 |
| AC005786.3 | -0.734650952 |
| AC010127.1 | -0.731600818 |
| KCND3      | -0.723325309 |
| NECTIN2    | -0.718918277 |
| ATP6V0E2   | -0.718153052 |
| DBI        | -0.711772107 |
| IL17RB     | -0.704686937 |
| FOXH1      | -0.704443814 |
| AL391422.3 | -0.682458435 |
| GPR39      | -0.67779584  |
| IGSF8      | -0.677782842 |
| FCHSD1     | -0.671731281 |
| KLC3       | -0.661533677 |
| IGF1R      | -0.655148729 |
| ANKRD9     | -0.645785695 |
| TUBB2B     | -0.64183188  |
| BRD7       | -0.636825385 |
| TCTE1      | -0.634897533 |
| PMEPA1     | -0.629847788 |
| CAPNS1     | -0.623529559 |
| RELL2      | -0.619092356 |
| TMEM129    | -0.617658417 |
| AC024896.1 | -0.612953274 |
| LRRC8C-DT  | -0.590349008 |

|              |              |
|--------------|--------------|
| AL451085.2   | -0.582336307 |
| ATP6V0E2-AS1 | -0.580987361 |
| AC092171.2   | -0.575133009 |
| AC080038.3   | -0.572188729 |
| SNRK         | -0.564671325 |
| NRG4         | -0.558367163 |
| KIAA1614     | -0.540461178 |
| NAV2-AS1     | -0.516495273 |
| IPPK         | -0.514546847 |
| SREK1        | 0.501683382  |
| FBXL3        | 0.503361121  |
| ERAP1        | 0.510214391  |
| AL136311.1   | 0.511706198  |
| PXK          | 0.516799307  |
| STAG2        | 0.519255224  |
| AP001496.3   | 0.531647196  |
| PFKFB2       | 0.548207937  |
| AL590627.1   | 0.54867793   |
| ZNF135       | 0.564103835  |
| RNF169       | 0.581682158  |
| CASK-AS1     | 0.582380731  |
| NEK5         | 0.586596231  |
| AL731566.1   | 0.592894966  |
| GANC         | 0.602748077  |
| RNF19A       | 0.627026603  |
| PIGF         | 0.630248185  |
| DLG5         | 0.637956919  |
| DDR1         | 0.64411491   |
| SMG7-AS1     | 0.646381923  |
| PLEKHG1      | 0.647145155  |
| AC036103.1   | 0.650499517  |
| DPH1         | 0.663221794  |
| AL353593.2   | 0.663264816  |
| AL049829.2   | 0.665821701  |
| ATM          | 0.668470905  |
| ODF2-AS1     | 0.671236377  |
| GNPTAB       | 0.675979907  |
| VPS13C       | 0.6774822    |
| HIST1H4I     | 0.68228335   |
| AC005520.5   | 0.683596209  |
| TTBK2        | 0.684220162  |
| AC091153.4   | 0.685573704  |
| SLC44A1      | 0.691357153  |
| CMTM7        | 0.694320835  |
| AC007938.2   | 0.700870074  |
| CEP290       | 0.70472518   |
| FAM13A-AS1   | 0.704933291  |
| MICAL1       | 0.71796338   |

|            |             |
|------------|-------------|
| SLC49A3    | 0.71908053  |
| CEP72      | 0.720450769 |
| COL6A2     | 0.72224681  |
| ZC2HC1C    | 0.728126236 |
| ARAP1-AS1  | 0.728554344 |
| AL035448.1 | 0.734207973 |
| CELSR2     | 0.734269909 |
| ISOC1      | 0.738242903 |
| BRWD3      | 0.739869102 |
| NSMAF      | 0.740197763 |
| TFF3       | 0.7548034   |
| SLAMF8     | 0.754955674 |
| CKB        | 0.755438637 |
| RAG2       | 0.761984607 |
| INE2       | 0.771095858 |
| YAP1       | 0.786970747 |
| GDPD2      | 0.78765185  |
| GRIA1      | 0.790676612 |
| BMP1       | 0.791080229 |
| AL391421.1 | 0.794593807 |
| CDH10      | 0.796621587 |
| KIF1B      | 0.798882984 |
| PLEKHA5    | 0.80365623  |
| CFAP69     | 0.805735629 |
| ANKRD61    | 0.807514958 |
| SIK2       | 0.810033536 |
| AC021504.1 | 0.814152204 |
| TMEM87A    | 0.816092978 |
| FAM227B    | 0.818208705 |
| AP000873.3 | 0.818308739 |
| TBC1D2B    | 0.822299206 |
| AC079329.1 | 0.822878281 |
| EPHX1      | 0.826755632 |
| DNAH11     | 0.831503131 |
| SMPD3      | 0.831543476 |
| COG6       | 0.835102494 |
| AL391839.2 | 0.837241423 |
| HLTF-AS1   | 0.839801934 |
| ZNF573     | 0.849286819 |
| ZKSCAN1    | 0.849448288 |
| EMILIN3    | 0.860434213 |
| RIOX2      | 0.86077812  |
| TLDC2      | 0.870487268 |
| GPRC5B     | 0.873514762 |
| PROX1      | 0.873691236 |
| NBPF1      | 0.875310339 |
| KIAA1328   | 0.879122055 |
| AC078795.2 | 0.888041584 |



|            |             |
|------------|-------------|
| FLNB-AS1   | 0.889735317 |
| POT1       | 0.900494873 |
| AL158835.2 | 0.906574079 |
| CDKN1C     | 0.907624882 |
| FAM166A    | 0.9231997   |
| PDE3A      | 0.936706026 |
| C1GALT1    | 0.937201637 |
| PPM1E      | 0.939074041 |
| LAMA5-AS1  | 0.946100649 |
| CRYBG3     | 0.946601365 |
| THSD4      | 0.951040859 |
| NBPF10     | 0.951824278 |
| ARFGEF1    | 0.952348375 |
| AP000942.2 | 0.959337162 |
| PCDH7      | 0.963125237 |
| KIAA1324L  | 0.968541577 |
| C14orf93   | 0.971438153 |
| SEMA6A     | 0.981731092 |
| CD36       | 0.984950773 |
| AC015563.2 | 0.990539842 |
| CENPW      | 0.990928964 |
| PCDHA10    | 0.998024939 |
| RBM24      | 0.999069592 |
| ZNF703     | 1.00141371  |
| GIPR       | 1.002251248 |
| USP25      | 1.002516851 |
| LDB2       | 1.003818557 |
| AOX1       | 1.008079357 |
| SLC8A1-AS1 | 1.016369182 |
| AC003986.1 | 1.019771565 |
| CNTLN      | 1.02309808  |
| RGS9       | 1.024101387 |
| F13A1      | 1.024238048 |
| PRSS54     | 1.026681885 |
| CAMK1D     | 1.026740195 |
| AL139398.1 | 1.029705109 |
| GHDC       | 1.03428059  |
| UFSP2      | 1.040595376 |
| CDO1       | 1.054440753 |
| SERPINF2   | 1.056029518 |
| CERNA1     | 1.062032646 |
| RPS26      | 1.070512581 |
| ZNF518A    | 1.078988152 |
| AP000688.1 | 1.079654721 |
| BOC        | 1.079665686 |
| AC016597.1 | 1.082302474 |
| LMAN1      | 1.094270342 |
| CBLN1      | 1.102847227 |

|            |             |
|------------|-------------|
| CCDC13-AS1 | 1.105910734 |
| ENPP2      | 1.109114827 |
| AGPS       | 1.113765639 |
| LRRK2      | 1.117634522 |
| SESTD1     | 1.124239781 |
| AL033397.2 | 1.12991896  |
| SGSM1      | 1.133138102 |
| AC069444.1 | 1.141724322 |
| CFTR       | 1.145089003 |
| AC078795.3 | 1.145406973 |
| AL078601.2 | 1.145992418 |
| PITPNM3    | 1.155592447 |
| AC099795.1 | 1.156753566 |
| NEK7       | 1.169628458 |
| ENPP1      | 1.171113552 |
| MAP7       | 1.17405496  |
| AC098851.1 | 1.181519658 |
| AC012485.1 | 1.181946771 |
| AC104964.4 | 1.182197684 |
| TPT1-AS1   | 1.191267991 |
| TAGLN2     | 1.196683888 |
| PRRG3      | 1.201319166 |
| ARHGEF26   | 1.201685539 |
| AC073869.1 | 1.205167094 |
| CLCN5      | 1.205872017 |
| IMPA2      | 1.206951495 |
| SYNE1-AS1  | 1.209514327 |
| UBXN10     | 1.212162358 |
| HCG11      | 1.216720169 |
| GPR37      | 1.223946314 |
| AC078883.1 | 1.22761555  |
| PISD       | 1.228235695 |
| CCDC114    | 1.230285914 |
| CDH23      | 1.230609653 |
| LYST       | 1.233354945 |
| AC079385.2 | 1.236565767 |
| AL133367.1 | 1.239252143 |
| RAB38      | 1.241961403 |
| AC126755.1 | 1.243512859 |
| SERPINI1   | 1.245927232 |
| ATPAF2     | 1.246643962 |
| IL1RAP     | 1.251000634 |
| DMD        | 1.254644293 |
| AC067930.5 | 1.256939402 |
| MYO3A      | 1.272284791 |
| PIAS1      | 1.280701164 |
| DLC1       | 1.282209653 |
| NF1        | 1.285944703 |

|             |             |
|-------------|-------------|
| FAM196A     | 1.294109232 |
| PPP1R1B     | 1.297429402 |
| AL050331.2  | 1.307909251 |
| SRPX2       | 1.310721104 |
| NEK9        | 1.311458998 |
| AL137804.1  | 1.313663757 |
| SNRPCP3     | 1.31391476  |
| FHIT        | 1.327661589 |
| TUSC1       | 1.333463067 |
| STARD5      | 1.336522925 |
| SLC29A1     | 1.339732287 |
| AC007255.1  | 1.340435974 |
| GALK2       | 1.344535009 |
| CEP126      | 1.349177878 |
| SPATA17-AS1 | 1.349676489 |
| AC010969.1  | 1.357255739 |
| HMG5        | 1.357257863 |
| AC093535.1  | 1.35795144  |
| KCNH5       | 1.35841936  |
| GAS8-AS1    | 1.362144543 |
| JPH1        | 1.362733322 |
| MS4A8       | 1.373829359 |
| KLF5        | 1.376901457 |
| SLC37A1     | 1.380998939 |
| LINC00602   | 1.390274936 |
| ROR2        | 1.390649001 |
| VILL        | 1.390846164 |
| AC233296.1  | 1.391230104 |
| CD200       | 1.412054634 |
| MPPED2      | 1.416981704 |
| HCG4P5      | 1.420913868 |
| KCNH2       | 1.427642807 |
| TAF1C       | 1.430864308 |
| SPOCK2      | 1.438576888 |
| KCNH7       | 1.440124928 |
| PHEX        | 1.445302196 |
| OTX2        | 1.448993838 |
| RASA4B      | 1.454917778 |
| AC104964.1  | 1.458453811 |
| LRP1B       | 1.46266518  |
| MYO1D       | 1.466027247 |
| TMC5        | 1.467466516 |
| AC097515.1  | 1.471739118 |
| ADAMTS2     | 1.472682441 |
| NR4A2       | 1.472916944 |
| AL354733.2  | 1.474988082 |
| ITGA11      | 1.486227703 |
| CFAP44-AS1  | 1.486759925 |

|             |             |
|-------------|-------------|
| HNMT        | 1.491436871 |
| MMRN1       | 1.491732151 |
| PPP1R3C     | 1.495001375 |
| AC002398.2  | 1.497403645 |
| TC2N        | 1.497788917 |
| ADAMTS12    | 1.499765402 |
| AC027097.2  | 1.503260122 |
| SELENBP1    | 1.507321747 |
| IQCA1       | 1.511702041 |
| AC092134.1  | 1.513957005 |
| AC002064.2  | 1.518778872 |
| LINC00954   | 1.519534811 |
| TBX18       | 1.526559965 |
| AQP3        | 1.526900324 |
| AC008011.2  | 1.539609663 |
| CHN2        | 1.545029116 |
| LURAP1L-AS1 | 1.547407329 |
| AC092641.1  | 1.555924014 |
| AC079385.3  | 1.56132382  |
| GPR156      | 1.568226846 |
| AL354733.1  | 1.573696039 |
| AC078883.3  | 1.574769398 |
| LGI3        | 1.57785541  |
| ATP8B4      | 1.588996452 |
| RSPO2       | 1.58950254  |
| C3orf67     | 1.593567654 |
| AC078883.2  | 1.596349699 |
| MARCHF7     | 1.607444219 |
| PTCHD1      | 1.618098879 |
| CFC1        | 1.623884056 |
| AC078882.1  | 1.634189337 |
| KLHL41      | 1.642882832 |
| TPPP3       | 1.674907251 |
| LRMP        | 1.676757499 |
| AC027097.1  | 1.678203913 |
| AC130456.3  | 1.682145314 |
| NPAS2       | 1.69039847  |
| LPIN3       | 1.705654797 |
| DISP1       | 1.715665786 |
| LINC02381   | 1.735066527 |
| ALK         | 1.739713786 |
| IQCA1-AS1   | 1.742394106 |
| CR392000.1  | 1.74977857  |
| ARHGEF11    | 1.751183968 |
| HTR2C       | 1.757666734 |
| MMP11       | 1.760325686 |
| TTC14       | 1.764491913 |
| AP003032.2  | 1.779615827 |

|            |             |
|------------|-------------|
| KCTD12     | 1.787129069 |
| RBFADN     | 1.796527465 |
| FGL2       | 1.813646845 |
| EDARADD    | 1.822491378 |
| INHA       | 1.824553995 |
| CDCA7L     | 1.824877737 |
| CTNNA3     | 1.829503353 |
| AP000320.1 | 1.842662689 |
| COL16A1    | 1.849028175 |
| AC092142.1 | 1.853481738 |
| AC008114.1 | 1.863672584 |
| FER1L4     | 1.877111173 |
| LINC01123  | 1.880077703 |
| AL590560.2 | 1.887538935 |
| ZNF385B    | 1.898970048 |
| SBSPON     | 1.914715543 |
| CDH7       | 1.923237802 |
| AC008073.2 | 1.925210985 |
| NUDT7      | 1.929231415 |
| ADTRP      | 1.936343765 |
| ACCS       | 1.943975274 |
| PABPC4L    | 1.944952776 |
| HHATL-AS1  | 1.953087025 |
| DEPTOR     | 1.955550048 |
| SIX3       | 1.96131923  |
| ZXDC       | 1.967047594 |
| AP000560.1 | 1.974976266 |
| MYO7A      | 1.997942984 |
| DCAF12L1   | 2.005836151 |
| SERPINA12  | 2.014251562 |
| RPL21P43   | 2.015186346 |
| SLC17A9    | 2.015909681 |
| AL049697.3 | 2.02148983  |
| ELN        | 2.035668623 |
| AC010255.2 | 2.041999071 |
| DGKG       | 2.069764721 |
| SCGB1B2P   | 2.073074629 |
| UNC13C     | 2.089156192 |
| HIST1H2BC  | 2.102336041 |
| LINC02052  | 2.106057637 |
| AGTR1      | 2.109983123 |
| MUC5B      | 2.119744076 |
| BCAS1      | 2.119984266 |
| AC005682.1 | 2.137416298 |
| KAAG1      | 2.153158255 |
| ABCB1      | 2.158917745 |
| RIMS1      | 2.160244779 |
| FYB2       | 2.162022742 |

|            |             |
|------------|-------------|
| LINC00467  | 2.17869866  |
| IL1A       | 2.182675625 |
| AC005209.1 | 2.187028314 |
| PDZD3      | 2.196396857 |
| AL512625.1 | 2.201508388 |
| MUC15      | 2.220391179 |
| HTR1E      | 2.239222995 |
| ALPK3      | 2.246628959 |
| AC016757.1 | 2.259080379 |
| HEY2       | 2.260432402 |
| C1orf158   | 2.26272048  |
| PTCHD1-AS  | 2.264691523 |
| LTBR       | 2.272686489 |
| CALCRL     | 2.274508779 |
| AL353572.1 | 2.28814172  |
| GABRG1     | 2.319465926 |
| AC097468.1 | 2.332943279 |
| CYP11A1    | 2.384275767 |
| AC025038.1 | 2.385697248 |
| NNMT       | 2.392031337 |
| AC130456.4 | 2.413236239 |
| TTR        | 2.415955986 |
| SMOC1      | 2.431529766 |
| SLC38A4    | 2.432177856 |
| SLAMF9     | 2.434916421 |
| OTOF       | 2.438065045 |
| COL8A2     | 2.440391242 |
| CILP       | 2.4429999   |
| PI16       | 2.453284328 |
| TRIM58     | 2.466120317 |
| NKX3-1     | 2.477162127 |
| AL021391.1 | 2.497245462 |
| AL355812.1 | 2.514887682 |
| AP005120.1 | 2.517407272 |
| GZMA       | 2.5435967   |
| CNMD       | 2.569256265 |
| EGFL6      | 2.601010737 |
| SLC22A8    | 2.653853247 |
| AC104809.1 | 2.682449831 |
| PRKAG3     | 2.743168102 |
| CCRL1P1    | 2.784860628 |
| AC126323.6 | 2.795811377 |
| AL392003.2 | 2.827602631 |
| LINC02020  | 2.827769923 |
| AC005871.2 | 2.853124899 |
| LINC02389  | 2.854986809 |
| SSTR5-AS1  | 2.899796755 |
| CLDN5      | 2.901522745 |

|            |             |
|------------|-------------|
| AC079360.1 | 2.908736275 |
| HSPA8P7    | 2.912099073 |
| SLC28A3    | 2.92667504  |
| EPS15P1    | 2.935332514 |
| RAB37      | 2.966696327 |
| SPDEF      | 2.985989169 |
| LINC02056  | 3.012624473 |
| LINC01361  | 3.074152935 |
| RF00019    | 3.081729229 |
| LINC01257  | 3.088816575 |
| AC061979.1 | 3.096446458 |
| AL356134.1 | 3.10434782  |
| ACAN       | 3.105117014 |
| NPFFR2     | 3.142334439 |
| LINC00654  | 3.167403489 |
| AC138819.1 | 3.200121296 |
| AL512625.3 | 3.202513781 |
| AC098476.1 | 3.217874585 |
| FER1L6     | 3.33832231  |
| TTLL10-AS1 | 3.348024901 |
| AC005281.1 | 3.443988178 |
| PZP        | 3.460660282 |
| CRACR2A    | 3.465026778 |
| AC005831.1 | 3.671035995 |
| CCDC68     | 3.723613334 |
| AL161618.1 | 3.749869823 |
| LINC01537  | 3.891135409 |
| DGAT2L6    | 3.9650696   |
| LINC02208  | 3.975688856 |
| MUC5AC     | 4.086899719 |
| AC091062.1 | 4.458167326 |
| AP001999.1 | 4.715998118 |
| CYP26C1    | 4.852844974 |
| AC097493.2 | 4.895581365 |
| PRPH2      | 5.390830869 |
| SMIM31     | 5.725410845 |
| MYO5BP2    | 6.307212632 |

**Supplementary Table 13.** DEGs between DA neurons derived from PD patients with E326K-*GBA1* mutations compared to control neurons and DEGs between DA neurons derived from sPD patients compared to control neurons.

| Comparison                              | Original  | Bonferroni | Holm_Bonferroni | Benjamini_Hochbe |
|-----------------------------------------|-----------|------------|-----------------|------------------|
| Control-sPD Na                          | 0.003     | 0.054      | 0.039           | 0.0041538        |
| Control-GBA1 Na                         | 0.0028    | 0.0504     | 0.0392          | 0.0036           |
| Control-GBA1 Fast potassium             | 0.5201    | 1          | 1               | 1                |
| Control-sPD Fast potassium              | 0.5597    | 1          | 1               | 0.93184          |
| Control-GBA1 Slow potassium             | 0.4515    | 1          | 1               | 1                |
| Control-sPD Slow potassium              | 0.3523    | 1          | 1               | 0.90591          |
| Control vs GBA1 PD (EPSC Rate)          | 0.0389    | 0.7002     | 0.389           | 0.07002          |
| Control vs sPD (EPSC Rate)              | 0.11      | 1          | 0.99            | 0.22             |
| Control vs GBA1 PD (EPSC Amplitude)     | 2.244E-05 | 0.000404   | 0.00040397      | 2.24E-05         |
| Control vs Sporadic PD (EPSC Amplitude) | 0.0008995 | 0.016191   | 0.013492        | 0.0010794        |
| Control vs GBA1 PD (Total spikes)       | 4.986E-05 | 0.0008975  | 0.00084764      | 5.28E-05         |
| Control vs Sporadic PD (Total spikes)   | 0.008     | 0.144      | 0.088           | 0.013091         |
| Control vs GBA1 input conductance       | 0.8613    | 1          | 0.8613          | 1                |
| Control vs sPD input conductance        | 0.6791    | 1          | 1               | 1                |
| Control vs GBA1 capacitance             | 0.2666    | 1          | 1               | 0.59985          |
| Control vs sPD capacitance              | 0.842     | 1          | 1               | 1                |
| Control vs GBA1 large epsc rate         | 0.000061  | 0.001098   | 0.000976        | 0.000069         |
| Control vs sPD large epsc rate          | 0.0042    | 0.0756     | 0.0504          | 0.0063           |

**Supplementary Table 14.** Multiple hypothesis corrections for the electrophysiological data.
